# Supplementary material for: The Candida albicans virulence factor candidalysin polymerizes in solution to form membrane pores and damage epithelial cells
Source: eLife journal article supplement (doi:10.7554/elife.75490), 2022-08-16
Supplement: fig1-data2 [file MP_Data_WT CL_Figure 1 Source Data 1.xlsx]

## Sheet: WT
Exp 1		Exp 2		Exp 3
Mass (kDa)		Mass (kDa)		Mass (kDa)
113.245		67.7202		81.7819
117.702		85.6081		173.969
63.8481		1001.76		80.9324
97.6833		-143.518		115.153
116.761		114.679		109.374
52.2926		176.428		332.392
103.022		84.4321		162.22
118.418		119.708		1102.45
130.914		379.146		339.709
58.6343		125.86		73.5461
154.882		249.937		133.757
102.805		57.061		138.936
119.063		167.463		213.702
105.56		63.6607		63.3294
55.8273		655.926		531.299
125.4		447.371		115.687
134.678		329.529		76.9147
99.4622		125.268		476.886
71.5719		87.833		248.28
107.827		227.644		64.5784
102.914		101.709		215.958
147.885		67.6261		721.03
70.1419		269.258		493.044
118.956		435.446		115.996
118.364		69.0233		86.8911
124.821		127.272		80.8497
95.2022		201.098		966.269
110.881		62.2745		126.92
56.4585		85.3018		2063.15
38.5047		71.9642		343.786
100.949		101.455		142.204
45.9501		67.3742		229.321
180.284		337.96		190.727
-77.9731		79.2419		263.391
126.355		134.821		3723.45
229.55		104.55		194.294
216.476		520.283		187.975
98.616		54.7266		75.0212
191.328		98.8334		202.652
74.7323		688.889		150.001
562.165		268.704		921.345
555.345		228.929		366.397
119.575		433.251		95.6614
119.706		74.3456		92.9573
207.016		74.653		58.2736
95.9071		237.655		231.885
162.329		64.2038		440.555
-54.8096		181.018		318.465
94.1759		65.0381		157.888
111.888		61.5833		62.4051
389.587		70.5498		306.305
129.402		58.6313		74.7928
99.8476		264.916		92.2962
126.83		218.211		-60.9005
205.915		175.842		-58.6481
97.4297		-66.1844		399.573
73.3751		55.6443		292.098
188.544		65.4819		160.013
83.5966		91.6081		70.8462
155.724		456.356		233.3
94.2501		195.451		198.857
90.1755		53.9541		65.623
83.1043		-98.4934		427.965
56.203		214.262		300.902
72.2454		247.865		252.533
70.4878		148.135		112.422
105.174		255.756		272.637
266.829		80.2698		79.4526
94.4253		60.4552		97.2591
121.793		63.2199		380.764
79.8917		294		348.565
48.2784		138.94		58.368
153.636		133.718		230.95
113.679		193.064		71.2784
81.6174		-111.576		342.501
252.846		53.8188		97.0553
135.357		172.824		153.938
103.222		150.565		453.517
65.5678		179.664		76.0619
182.417		-73.83		65.1454
86.319		164.649		-71.1319
154.366		172.717		-65.5962
69.748		58.9942		260.772
199.926		49.0249		135.154
292.943		71.9807		72.5737
308.777		-99.3364		485.346
79.1897		67.7137		135.037
53.7938		75.3172		297.19
123.791		247.457		158.577
101.202		57.0558		195.291
133.486		1066.61		81.49
175.087		373.078		224.665
130.502		53.5117		66.5445
68.5054		66.0982		112.291
195.429		68.0886		141.885
168.975		153.756		91.77
211.56		56.3544		88.7254
831.308		355.797		972.473
90.5456		138.205		156.484
104.603		62.239		315.601
57.8359		73.46		73.3398
53.4902		84.2544		482.236
57.6571		221.201		210.645
170.006		148.087		245.027
127.37		85.5067		81.4256
304.397		-115.588		245.624
65.6746		192.777		74.2679
488.386		88.0431		70.7729
116.987		53.9615		376.59
89.7515		100.494		816.245
132.403		77.9053		77.3111
133.861		70.6359		69.6241
159.636		55.7488		118.828
274.88		139.068		82.0656
125.921		204.044		59.5783
95.5803		87.1729		286.952
132.961		78.9184		322.696
77.1598		69.3025		70.6132
50.9876		102.212		66.3658
177.083		73.0844		139.037
53.9449		93.5218		67.0318
55.0852		57.0153		63.3594
318.81		63.7405		794.426
198.725		102.075		175.409
433.285		297.007		196.529
58.4347		365.796		86.1246
65.8172		74.212		558.576
48.6406		140.176		285.302
261.577		1222.97		371.831
71.8673		443.672		216.89
276.415		93.0326		114.711
52.9206		86.1678		295.304
158.492		70.1191		67.8641
181.814		153.614		65.5315
281.867		136.247		682.543
60.0688		86.0789		210.387
182.942		387.663		419.703
62.8965		173.184		66.9301
235.39		76.9489		143.274
113.902		67.809		-60.3004
89.6121		57.7001		213.276
211.058		82.3699		337.194
49.525		67.3215		151.648
118.755		167.622		238.025
2241.12		83.4738		196.203
244.267		460.342		663.879
85.6617		66.0815		1016.85
52.965		70.0627		359.768
200.222		65.0439		383.58
66.8477		73.1828		166.498
154.579		46.8395		185.682
51.797		115.827		59.9166
120.992		-77.8731		61.3105
115.444		62.908		281.67
73.1779		143.347		77.7815
94.6987		243.856		261.186
707.088		194.042		-59.7351
193.871		93.455		126.935
77.9945		225.211		98.7854
67.4256		230.834		172.437
143.138		75.1042		113.828
112.576		66.0315		330.195
49.0351		67.8204		651.58
51.1335		89.1075		236.877
113.602		254.051		577.971
235.228		295.049		371.789
39.0493		68.0187		160.332
90.0608		361.446		467.984
122.568		176.059		266.9
326.59		53.564		801.207
166.344		64.5801		160.622
76.0838		432.919		394.24
275.065		66.8903		99.8995
52.3399		76.3481		152.765
73.7678		55.6929		113.712
143.526		235.65		408.545
229.085		196.499		347.379
102.504		77.6231		82.3303
51.842		-68.4451		81.6421
256.446		90.5452		58.718
73.8424		-98.986		158.054
279.445		311.861		107.135
69.5248		57.3582		63.6237
229.847		67.9766		225.448
48.7983		183.505		304.248
64.194		79.5711		109.949
196.933		86.0345		123.146
123.038		74.191		456.561
114.303		75.4888		322.774
321.829		149.355		112.024
55.5721		295.946		66.4768
63.8101		405.96		79.1736
182.03		60.9987		-63.6527
144.72		98.999		169.937
47.9431		75.2862		138.819
61.5634		87.2529		322.756
112.402		361.882		123.968
91.2065		91.5357		277.84
214.45		641.855		130.09
248.5		72.4126		740.992
62.2017		806.913		-51.6569
111.344		134.419		327.864
54.8815		62.9009		228.026
266.644		127.229		121.712
50.8266		51.6516		-56.6031
79.7228		121.15		112.766
51.3577		63.2642		203.803
84.5667		144.756		-58.105
216.755		72.1609		239.72
167.012		95.3842		140.751
151.14		401.709		236.582
62.1595		246.831		165.122
66.2831		130.883		151.387
205.467		1172.94		110.067
375.33		67.2549		352.006
67.6535		91.1238		256.141
101.169		93.1087		706.978
127.682		90.5103		256.768
252.315		-82.4841		169.092
75.1042		82.3923		119.265
52.6731		431.52		51.3925
229.532		-91.8659		373.68
55.5672		148.615		74.6372
175.983		-86.4133		79.9028
158.693		56.3556		97.1526
206.146		180.541		192.234
295.393		75.9278		119.13
383.675		91.3783		54.0003
74.1376		174.904		63.4176
79.0978		66.2508		137.49
145.258		99.6272		60.4916
94.9213		75.862		2728.7
129.501		53.4556		69.0517
106.898		120.105		159.757
75.6885		146.495		66.1224
49.8862		-131.157		585.228
144.427		341.196		68.0896
228.092		42.1181		280.412
53.988		88.7988		132.593
259.286		452.21		1202.39
214.212		170.928		424.094
61.9738		78.6386		267.1
235.77		69.7139		64.1862
60.073		52.1565		103.085
102.239		318.497		443.973
43.0878		89.596		96.4026
365.016		-92.0855		79.6018
200.611		61.7965		70.2135
97.9175		88.5747		315.007
139.478		65.9292		93.2701
126.911		52.1281		388.108
130.689		-50.3975		65.9218
59.2049		-58.9109		217.271
70.5691		124.475		132.794
74.137		85.3136		86.9208
49.802		75.9845		244.444
324.67		97.7178		496.53
121.867		62.9309		300.719
178.429		80.2417		199.033
84.4157		60.2866		99.9565
114.51		67.1466		61.5379
285.125		150.292		99.8873
224.775		145.443		65.2177
99.809		86.6832		246.198
214.741		46.3438		286.671
371.905		270.208		1330.33
72.3419		149.13		796.057
58.7901		422.24		202.152
124.38		79.492		359.58
349.218		150.313		164.402
95.5182		65.4716		117.266
171.052		80.2265		67.3356
103.545		60.5731		80.0651
186.702		69.2856		456
79.0871		147.698		1084.79
630.942		64.5357		234.628
441.003		64.2949		157.847
48.7199		597.897		123.507
277.927		134.233		74.8909
477.724		115.613		-78.6509
57.0343		485.907		893.191
68.7664		72.2578		553.256
68.3464		209.696		145.511
182.144		164.169		137.874
108.811		59.778		236.068
62.0404		171.803		81.4953
82.6372		82.005		294.643
87.5376		134.021		61.1658
319.296		192.817		338.999
355.418		-139.999		187.293
129.112		193.234		104.822
85.3483		-60.6337		-59.6081
300.823		72.1		89.7694
482.642		418.271		314.591
161.385		69.4313		486.154
86.2795		205.965		120.436
228.426		470.378		1255.87
244.219		71.4822		732.821
296.148		75.5125		186.459
252.402		138.05		249.667
613.554		152.025		311.702
135.254		-67.2433		387.486
299.283		63.4371		276.489
130.682		361.529		357.341
160.194		106.153		98.6257
258.523		111.519		393.743
859.75		104.078		450.863
450.986		75.569		183.806
124.934		166.635		315.743
87.1607		314.437		94.5153
158.425		404.885		63.6119
133.565		78.1587		156.905
50.2214		58.2848		102.315
235.529		60.5247		75.5183
144.713		292.532		74.0019
314.123		112.502		98.5605
137.369		65.5022		123.453
52.6837		176.14		88.0158
193.011		241.541		234.249
104.12		66.2839		540.974
61.8893		60.7064		164.671
72.0869		73.7721		277.611
180.573		179.635		119.068
186.628		79.5248		87.4304
638.96		94.8982		157.842
109.714		201.787		60.4433
284.458		112.009		237.964
370.74		117.377		60.0826
54.5112		248.348		-76.9284
376.311		59.8333		590.632
86.656		115.334		142.704
114.502		104.335		79.9062
268.412		102.821		87.7387
84.8531		57.0427		67.0061
96.5413		80.0827		230.029
394.835		242.524		311.922
137.939		292.107		-54.7614
63.0765		72.9192		77.7473
346.567		86.5362		60.6737
503.51		66.9064		285.993
37.7579		130.77		-69.6766
515.883		61.708		77.7354
235.525		-87.8418		170.43
52.0261		57.0827		393.899
87.1049		62.4877		-72.1382
136.559		108.385		71.6072
117.296		115.937		134.172
649.996		170.123		1055.31
109.868		70.7431		111.978
48.3956		99.7477		183.229
111.41		139.914		294.469
102.976		105.734		915.653
169.56		71.8589		325.215
65.1737		571.95		85.5171
196.717		204.907		413.326
110.815		163.288		331.961
191.868		69.4421		639.45
106.242		327.691		379.69
105.968		77.7516		502.322
244.448		61.5688		74.6411
118.827		86.9521		59.9983
135.812		124.98		200.622
70.0748		152.507		64.6995
233.412		85.7397		364.212
508.831		61.2128		291.407
45.8914		79.845		141.102
66.7349		154.013		292.411
293.824		67.5073		53.9365
98.4195		67.8162		139.175
144.795		67.3446		226.536
65.7402		66.4361		63.9868
168.537		2359.43		239.921
274.2		118.187		-59.5849
72.0288		185.6		-73.6088
135.002		-52.1526		84.9883
444.746		208.677		63.8106
55.9529		61.506		87.6715
44.7427		86.4532		236.489
124.127		-63.6727		114.177
94.3945		194.442		530.672
281.295		104.084		65.7991
303.28		96.8354		297.254
102.898		363.351		268.818
113.159		97.373		78.2861
258.216		522.029		125.598
95.0735		120.94		877.912
138.668		78.7283		92.07
199.502		95.131		1073.11
84.1699		-47.1003		68.0638
57.4051		128.67		362.261
48.2842		338.104		599.958
131.647		69.18		74.0052
273.089		253.329		69.2173
46.8282		246.394		83.076
142.395		-214.595		155.077
291.143		83.3342		112.544
85.7669		80.6755		85.0359
102.248		302.468		140.942
89.143		154.665		251.363
353.394		134.977		63.9949
47.2111		158.81		511.847
128.614		198.036		73.0209
181.666		50.7112		136.617
172.517		50.9685		121.97
74.5213		148.176		250.395
42.0439		83.7273		1072.57
402.384		141.774		52.5077
653.251		133.507		284.887
150.664		56.3873		618.881
482.764		226.579		152.691
124.437		92.0321		61.1161
231.995		154.332		180.184
64.0537		68.9403		97.1981
47.9514		-70.0212		337.969
96.5524		85.3664		318.761
107.21		426.136		67.3355
303.717		177.498		87.2723
128.388		151.179		1653.3
77.7108		80.3666		68.1734
180.475		-58.9512		439.889
174.776		363.122		95.631
47.5653		190.171		160.399
96.2519		231.549		217.652
78.052		276.507		67.8178
83.8544		261.467		302.235
85.3208		-53.445		222.762
127.956		122.347		106.124
133.552		62.1373		71.0447
166.912		78.3659		228.341
205.775		74.337		67.0177
79.5817		494.868		85.6259
122.327		97.8592		61.9055
54.6723		85.8174		920.684
129.034		54.4402		386.905
214.589		348.454		372.916
56.1277		78.018		-83.4049
63.1546		62.5521		408.057
49.6646		60.0359		315.156
119.072		142.289		149.882
248.445		89.7896		227.483
149.175		77.2574		-105.341
328.688		131.665		61.6544
112.099		107.366		68.4327
74.7138		346.928		291.413
77.3057		89.503		93.5395
270.906		54.7496		330.866
145.412		147.835		221.438
48.2088		118.539		106.939
213.599		78.2944		58.1609
138.455		89.3136		146.976
117.968		254.689		301.493
69.9886		157.342		101.76
160.203		88.0664		253.427
96.3846		65.3644		86.1456
84.3058		62.2329		400.646
302.382		261.397		251.158
90.5177		78.9023		-63.1653
61.465		585.025		161.328
385.312		116.439		100.936
93.4679		91.7205		129.899
226.577		368.284		417.876
51.7302		112.334		567.302
79.0557		96.9831		213.989
284.51		-54.4813		116.036
175.974		66.3142		641.95
77.1419		73.5326		1009.38
287.003		75.8429		688.523
57.7403		482.931		-76.9923
67.282		80.7541		-69.5956
50.8519		94.8317		149.422
111.766		152.85		-69.7976
50.5349		57.4469		68.0052
377.699		201.09		442.558
132.148		62.1931		163.342
229.194		62.3477		475.006
153.149		78.0121		79.1763
42.6822		107.944		300.294
50.3167		262.193		63.4984
109.922		66.2361		-54.9923
167.352		91.8015		523.518
68.2916		217.068		69.9276
160.047		351.072		79.9102
95.2957		94.4106		437.65
75.5462		-58.066		-72.9193
136.176		110.246		75.2654
424.336		55.1506		-72.3711
87.7262		266.917		112.735
74.2088		344.762		226.885
161.452		-79.395		556.682
148.081		109.277		-74.0614
295.748		67.0587		81.987
51.1359		73.4865		-56.7254
150.235		145.311		278.04
229.07		92.8346		79.6277
146.289		172.343		971.737
57.2461		-86.1368		89.7577
169.531		139.325		130.863
111.722		66.0773		-83.6681
132.768		227.128		-77.6849
98.2377		90.1884		1086.01
168.273		-57.4555		-70.0649
128.795		66.6609		69.8422
224.913		64.2399		-82.6222
49.5816		66.9231		233.389
551.846		221.616		63.9271
127.24		-84.0247		92.4492
261.811		-71.6301		73.602
110.893		-60.7641		102.401
76.0544		66.261		-91.5682
98.8835		98.7359		310.395
64.5013		-61.6205		78.8426
63.5978		135.36		-80.7281
98.9557		270.742		294.61
76.2105		72.7123		69.7012
99.4097		54.6698		193.819
45.9046		69.0384		113.566
52.8757		135.331		-65.9469
86.0629		97.5756		222.053
45.1729		-72.3361		435.18
235.495		436.065		135.025
52.9167		406.014		68.1626
162.304		57.3359		76.6388
187.518		104.395		62.9818
279.319		-97.4608		73.4333
130.794		58.799		105.054
55.7377		81.7164		181.444
200.788		434.964		720.337
154.549		72.5749		-100.719
124.017		71.2733		118.829
653.881		62.1968		258.197
113.67		55.585		-70.9682
179.825		91.5717		91.8242
48.2085		528.38		76.0537
277.955		56.6395		-90.2805
78.9483		92.1308		-73.204
99.8132		67.0919		-77.0159
182.152		127.268		205.122
129.13		747.43		204.231
171.655		202.658		118.273
356.171		53.991		73.3466
275.165		79.3764		65.8117
68.8344		929.126		65.9662
227.007		152.321		312.668
125.608		180.652		-72.1365
97.8152		-79.326		206.875
94.2367		89.0877		215.145
87.2345		181.361		551.065
99.0427		64.2037		103.247
133.514		59.7575		-64.5849
109.406		141.712		66.3406
267.586		67.8672		71.2078
119.705		492.063		-83.8626
860.292		176.684		699.856
176.663		88.5438		569.763
132.587		98.3062		144.434
484.139		216.174		619.013
79.8819		49.0297		181.475
174.093		112.075		639.314
64.3636		121.826		170.594
130.14		73.3753		154.059
100.648		76.0855		315.823
70.7829		58.2678		83.7493
280.779		363.509		81.705
88.7776		60.9082		99.0765
93.5863		77.8445		97.2433
365.391		98.8962		366.449
232.844		-55.1431		149.473
65.9455		180.678		121.71
92.7597		88.4304		406.356
55.1133		-86.8731		576.92
97.9633		162.254		-83.3662
208.929		80.4274		669.507
93.3843		790.552		229.106
178.893		64.0105		426.884
147.156		154.146		372.632
47.5448		54.4846		427.244
83.0641		92.0065		58.6416
99.1846		195.106		-51.5171
53.9568		56.0362		105.55
81.1735		69.8088		243.338
75.0758		253.648		510.989
152.625		111.385		197.815
41.4577		127.171		601.883
245.796		266.152		67.2861
374.259		275.93		262.123
45.0541		163.934		147.535
98.0588		72.0231		91.8271
45.9192		199.963		65.4208
214.307		-60.5656		697.673
290.231		136.474		348.955
55.8412		-69.8915		-105.962
88.0629		84.8263		-75.9545
89.1447		138.847		123.055
324.324		77.9887		666.684
292.035		121.8		299.755
73.2156		64.3183		79.9928
236.459		86.6704		-56.0887
66.2874		185.09		326.421
100.922		457.087		-72.2279
81.254		330.881		132.047
122.098		267.964		484.807
47.8963		211.573		299.135
176.129		210.946		97.31
320.038		66.9836		136.323
132.039		64.6073		189.002
187.228		228.84		60.924
115.374		129.778		123.201
100.14		54.304		1078.29
398.331		375.425		413.46
378.487		74.1853		427.672
80.4336		69.9802		413.348
433.598		85.6345		120.375
133.03		315.001		80.1973
192.582		87.6867		61.3143
106.6		52.2027		-73.8472
662.692		382.06		264.376
99.3636		63.1885		78.5996
80.1799		55.9151		802.856
194.086		98.6592		-69.4948
70.0201		412.88		110.806
287.944		106.495		73.8896
114.412		59.2543		63.86
204.985		44.0947		-125.226
84.6872		97.3927		208.069
114.541		591.938		235.97
630.276		272.51		104.951
262.075		237.568		79.4086
144.48		407.919		341.617
66.2674		318.067		659.76
90.3368		63.1124		-72.6017
112.774		62.7404		70.4542
80.682		158.005		105.023
57.281		-82.3931		131.203
59.8893		174.275		-71.1716
140.872		399.181		106.095
144.065		107.609		880.85
62.4372		86.0158		159.899
64.5958		68.0834		133.334
82.5054		235.821		489.241
96.32		94.6218		66.0458
261.777		74.6491		82.3747
54.2147		116.979		98.3245
53.5766		147.451		242.723
40.3658		-110.938		419.006
340.336		142.739		-69.4412
392.854		103.377		-57.7143
168.545		111.4		-65.0712
265.982		106.935		87.276
78.8372		84.772		266.395
95.413		92.3588		64.0332
267.438		114.422		62.1887
375.047		203.726		536.02
51.9884		115.341		321.864
68.546		286.765		533.947
214.459		49.497		482.223
107.861		435.607		78.8303
151.738		191.439		69.6374
67.7899		99.8496		266.792
131.565		119.826		557.71
73.5185		80.2352		103.981
132.458		87.9703		92.8385
385.544		82.4776		93.1042
272.139		74.9157		1298.2
61.901		281.779		231.872
93.1579		67.974		-79.2087
147.338		116.892		710.83
250.45		265.683		71.5653
181.708		198.366		167.04
147.648		295.426		70.8486
59.0665		232.032		1123.4
41.8148		101.8		724.488
162.539		-58.0706		-77.6117
244.59		51.698		-63.487
132.502		292.061		636.961
166.607		81.9188		-78.1424
68.676		55.7274		113.272
70.1208		95.0244		220.69
86.498		54.9464		979.774
163.237		60.0454		136.992
113.264		292.369		-84.2032
136.612		168.049		120.105
73.7065		68.9233		240.86
52.7035		77.2324		154.148
130.248		-50.399		539.902
165.038		54.4983		375.549
54.4935		877.8		74.2709
83.0069		152.868		113.209
176.624		-68.017		298.266
118.736		69.4597		80.7893
359.738		315.516		82.8393
219.02		146.419		70.8524
372.244		72.7812		122.961
136.097		292.752		713.202
107.319		75.7852		410.134
108.783		63.2058		1006.65
85.2599		-52.9929		460.256
132.222		151.224		-54.5708
57.6845		-93.5515		456.828
198.426		61.5561		123.112
138.511		70.1977		-70.205
78.8466		82.1438		-66.4817
105.828		64.191		759.897
260.458		73.2922		62.3067
61.4274		72.3137		690.722
84.5545		185.237		129.396
73.4056		72.398		542.97
169.989		180.742		83.8212
53.9039		919.026		519.514
295.375		284.818		170.23
278.459		560.073		59.153
56.8914		59.5949		296.563
166.686		-65.9964		68.0075
93.1151		151.854		94.0842
130.6		-62.4316		-73.2074
95.6005		112.915		381.472
202.038		189.845		65.2111
120.615		79.405		600.903
48.2433		506.782		105.903
143.649		755.87		128.67
73.6917		65.0868		119.511
61.5158		56.7636		173.919
97.3987		206.351		-70.5245
55.3831		67.3872		61.3556
96.1828		239.009		1354.25
60.5862		282.46		393.187
107.692		189.157		-107.993
115.344		76.8157		137.06
119.471		-45.1956		67.0441
68.0281		285.257		424.293
128.692		189.64		-85.653
117.887		193.247		168.554
114.832		98.8095		92.7439
208.986		119.952		-66.7726
515.209		69.939		-100.065
142.877		110.314		817.421
152.224		135.57		89.1626
356.165		151.098		278.033
63.1754		124.339		73.6531
108.313		94.2624		73.7995
79.206		62.0301		381.979
58.7505		-68.1511		644.83
65.7624		216.684		114.32
200.052		62.6942		394.022
235.865		58.75		338.945
67.8456		297.518		95.4411
102.621		83.3988		116.639
108.689		76.104		266.965
107.965		108.98		71.4184
174.157		67.5197		510.888
102.622		61.0277		192.047
60.4905		59.7133		89.7349
178.865		129.308		75.6844
81.4337		1832.56		177.881
68.4781		199.71		299.825
79.1049		221.873		-84.6584
95.4348		80.7295		62.2137
125.554		457.977		337.246
56.392		123.013		-67.8482
108.227		53.542		172.795
45.659		127.548		76.2595
632.226		60.5875		71.3023
185.977		227.696		191.999
76.2192		199.28		568.814
84.6725		49.0815		982.698
67.7979		611.405		759.799
67.6025		452.802		208.71
57.0279		64.3325		153.285
97.7085		125.07		73.5963
87.1042		365.391		-166.288
180.619		522.867		-57.7611
80.6547		112.832		-63.2152
238.549		110.012		-74.0624
87.5019		279.538		825.271
69.6937		355.661		712.978
178.996		250.79		-91.5272
100.314		80.3296		80.1147
101.803		-76.8193		75.9516
174.848		61.8643		141.833
88.323		-74.7856		80.6772
98.4349		212.469		177.429
269.592		80.5554		208.388
250.685		131.921		-89.7779
135.856		73.0552		240.573
133.899		111.992		1536.04
201.631		75.12		-120.552
207.938		85.4784		112.376
85.8146		184.164		74.3698
71.3396		147.505		107.535
227.386		101.256		-69.5832
168.081		82.0885		74.4233
87.4269		126.297		106.327
68.1696		81.6643		476.722
201.213		49.5704		2661.17
223.908		118.736		1057.66
89.7948		506.114		123.322
162.385		74.8502		86.3368
42.509		53.4576		525.274
228.516		96.4986		-77.2964
105.55		66.3854		166.465
269.529		68.2116		188.018
64.0227		74.5523		62.698
186.53		110.929		211.613
80.7698		74.1088		72.598
247.392		64.5405		69.6336
73.4926		-68.2334		-60.7458
156.964		40.6944		368.579
147.602		184.494		173.053
139.778		60.1616		-66.5104
114.458		99.1426		-119.955
94.8519		381.793		470.185
274.807		237.738		375.511
128.566		144.671		106.923
106.55		-68.9665		240.152
193.235		81.4319		95.1282
147.155		138.932		64.1681
160.59		256.547		240.095
288.649		336.647		84.1789
147.257		125.951		238.73
144.149		69.6542		74.85
110.472		51.0434		89.8188
228.296		154.258		506.934
107.048		102.608		163.235
266.294		66.0332		187.808
210.483		343.747		366.487
126.658		146.747		174.09
147.365		182.45		92.397
90.6508		-65.3151		-81.9657
178.091		427.631		426.127
85.0754		148.191		124.759
102.453		89.8655		373.414
50.9131		62.7881		205.02
96.104		61.6435		313.498
73.4481		92.232		120.104
147.152		-101.916		67.5722
55.8321		73.2807		84.6701
452.366		60.246		149.675
134.93		57.7898		1509.2
170.706		65.7978		106.437
202.666		76.8752		220.287
3185.23		165.796		-67.8015
66.5185		83.1395		-62.9499
109.783		95.3247		-79.7901
69.0102		90.4772		-67.3161
161.903		145.326		-92.2927
68.7142		91.0008		80.8823
61.0141		79.8284		178.158
69.1414		266.563		165.693
67.258		916.771		219.063
285.622		102.959		87.1736
162.48		93.6856		181.203
93.3828		-62.0064		65.9628
121.538		76.7747		-62.8563
81.5429		-89.2673		288.55
103.937		805.809		-60.8768
52.959		183.219		97.8005
47.6025		250.781		-193.765
75.3778		70.5058		197.157
142.85		137.896		70.652
83.1676		65.597		99.1901
117.954		168.996		84.18
136.527		58.0804		-90.8596
156.818		192.532		396.471
282.735		330.879		192.737
110.247		61.5866		332.356
287.079		-67.851		1016.37
57.1011		-53.5526		65.4484
150.103		309.966		87.993
100.184		64.871		118.257
91.4861		143.938		395.445
412.086		223.538		236.615
88.9098		54.105		156.408
56.0759		96.0271		327.566
269.659		78.4789		179.728
209.228		90.272		411.676
172.445		98.616		573.023
255.143		134.463		108.279
46.5969		54.3566		190.792
74.5688		104.886		503.596
147.252		334.252		125.569
102.139		713.937		67.2807
236.688		106.263		72.3273
82.2666		222.768		245.884
72.7768		57.5172		545.562
111.061		1342.15		59.3096
48.5135		68.4863		656.305
116.704		82.6651		80.5755
212.071		-63.7371		320.31
81.6222		92.2944		66.6822
355.212		110.25		209.768
287.86		87.8424		251.64
139.262		48.7042		186.369
144.587		-67.3745		739.782
56.2462		81.7922		94.3785
181.473		276.262		822.153
71.0452		66.8016		338.62
237.39		86.4868		163.346
252.346		124.855		62.6374
99.7262		352.92		156.294
234.628		90.1934		183.263
283.324		85.8747		96.6812
45.3422		89.962		245.772
147.371		59.4439		259.208
139.8		121.247		905.245
526.683		99.8177		-78.0364
191.218		81.4515		477.519
119.548		63.2139		68.7853
350.041		-75.6701		-75.1909
122.365		143.463		452.126
173.797		191.137		-74.319
287.236		205.863		-66.1297
51.5926		92.1471		-57.5287
49.1202		175.074		1059.13
73.4434		48.9039		-74.3114
64.0472		80.7281		-68.6449
64.8486		157.223		66.958
123.236		129.03		461.222
201.789		95.1321		1327.54
91.8647		76.6979		65.7476
291.127		473.959		74.3654
160.032		188.185		80.5872
92.8823		-77.206		-60.6041
44.8062		57.8655		269.48
63.1193		55.6857		145.394
31.3972		150.109		-51.8898
180.459		136.11		-73.2212
156.277		77.8656		96.3648
113.522		53.6857		77.3726
47.5171		130.55		58.6609
100.347		279.362		96.3274
49.7688		57.801		141.277
120.576		88.9488		61.2703
58.358		82.8562		66.2469
96.5172		201.409		65.6138
221.865		168.592		83.8909
60.6104		82.8754		-73.6776
127.533		236.507		132.807
552.346		73.7583		100.925
146.967		83.4113		-78.5429
352.028		89.3282		443.389
70.7967		130.117		434.595
270.857		55.863		68.2156
59.7907		-85.2554		98.137
105.596		67.039		71.309
187.205		-64.6171		-66.405
97.8334		70.6721		597.54
170.908		61.4029		275.389
211.611		343.378		77.2247
441.13		69.1237		634.99
71.7078		-46.4574		244.519
158.041		221.067		127.509
164.328		62.6272		75.2474
92.4627		63.9067		57.6798
57.7534		92.0465		67.4192
66.1148		80.2631		-91.3503
83.8498		380.433		120.193
136.338		60.2127		94.773
60.7567		324.413		160.501
133.519		49.7873		69.8838
164.447		110.526		83.0083
54.1095		62.4751		76.5186
54.135		440.977		129.434
119.872		60.517		149.066
158.174		77.139		264.261
82.9518		53.5649		342.698
80.4744		68.4797		106.431
65.3017		72.1219		71.4247
52.5671		56.0609		-91.4352
61.5443		231.444		75.0454
101.803		979.289		145.11
160.031		67.3948		66.5438
206.492		55.2541		1304.12
80.4395		192.486		89.5682
80.4963		67.8088		170.02
44.2236		69.3381		905.733
122.942		80.7751		266.893
326.643		84.2491		-69.6009
341.023		138.827		-65.5916
69.5838		65.7169		122.251
71.1071		83.8926		78.7137
57.7627		290.676		103.068
304.563		252.475		64.1786
70.8085		68.7444		-74.9052
283.622		196.811		96.9619
54.5164		42.5724		326.846
486.574		60.8227		76.058
69.194		64.3222		-59.1955
105.777		161.038		1397.35
100.15		61.5614		468.682
49.8173		-66.4123		184.384
62.2659		60.4408		85.6277
172.126		165.293		-1336.35
46.5062		-62.7363		267.923
128.761		65.468		68.201
74.8027		194.823		-64.3614
79.1937		61.0309		65.6485
126.213		635.999		74.5511
94.1438		62.0254		93.2923
100.688		79.2197		83.9532
169.359		248.269		-65.5597
127.776		81.6263		-61.7474
74.6762		91.6186		157.468
267.293		74.593		283.019
111.775		140.3		107.412
48.9784		143.221		179.289
156.284		63.0726		88.8338
114.608		486.915		267.847
200.02		88.2443		-70.381
280.532		69.8743		64.7571
74.8995		169.36		134.301
52.1355		137.569		107.55
54.258		58.1014		90.2694
94.5209		57.8506		65.8255
301.585		314.704		95.1476
268.225		94.9672		70.7221
197.218		207.644		180.86
167.704		83.0214		511.777
127.737		140.047		-70.9549
92.1596		171.372		988.329
176.097		225.081		197.876
110.222		54.0087		-66.5805
68.8331		57.857		297.718
291.517		141.389		-87.6382
355.48		158.184		318.928
76.7289		351.192		108.341
156.365		761.685		125.337
61.3526		67.2485		66.8307
35.5447		371.732		69.8518
113.2		81.7355		467.663
206.101		92.7981		88.2001
87.0237		261.46		-63.4701
114.053		65.9138		85.801
116.241		556.541		71.7746
320.094		79.0882		331.918
47.8617		191.896		124.194
144.157		47.0866		462.581
83.3825		416.624		110.25
183.702		274.214		112.165
94.1441		97.116		64.2513
73.1005		66.6687		262.768
188.393		62.3123		-68.4651
70.5846		75.2692		427.426
108.65		210.733		74.7911
97.2278		75.0842		304.357
70.6987		79.5341		101.862
46.9935		208.721		-64.8457
129.085		102.371		-68.8237
76.5923		57.7229		257.928
132.778		83.3951		454.456
109.172		135.345		339.491
180.451		127.106		76.2335
193.826		156.066		478.968
50.252		140.606		73.0669
69.047		208.805		105.334
121.086		220.316		178.392
84.4898		149.207		93.7133
120.467		127.768		97.6264
460.611		92.6369		864.268
53.4512		92.8702		649.961
46.6426		54.6477		189.365
318.904		70.1293		-67.9876
40.1571		63.1156		228.781
66.1136		169.512		117.483
51.3751		175.365		75.8842
54.9983		126.75		117.954
85.6602		52.7001		161.235
170.177		59.2573		87.5509
209.535		57.1319		83.4867
148.545		75.6376		64.1975
62.5699		76.0644		67.5021
87.1101		467.887		184.768
217.149		102.188		195.821
253.722		263.054		780.177
51.8491		128.397		69.2267
236.404		99.7777		238.985
75.714		71.1646		281.249
96.4816		601.889		529.209
96.3712		505.457		129.787
63.1217		115.581		82.1409
130.293		120.747		-54.7282
117.744		57.5406		139.812
181.31		-59.278		540.252
82.6734		79.7229		69.6915
49.9638		301.873		372.438
173.912		-58.1862		102.321
85.5731		74.5486		218.479
71.8764		-65.4944		934.705
252.923		73.1396		376.288
153.948		88.1857		-64.0082
111.494		85.4741		175.054
139.145		267.453		124.648
104.9		58.963		223.372
50.1966		150.716		101.767
255.609		71.5864		-60.4953
64.1294		5622.39		102.435
45.8517		118.929		-82.1239
64.8257		411.934		370.485
54.7219		166.403		99.4668
116.474		93.3263		50.137
141.532		639.541		61.0973
120.516		56.7995		83.1308
118.466		94.9844		292.754
66.8274		389.919		132.49
83.998		779.273		1015.78
151.235		119.436		-55.1637
92.7582		234.435		535.849
181.177		123.915		549.367
218.863		255.441		120.56
52.3513		388.236		84.5157
204.162		57.653		166.15
146.246		161.173		184.664
116.913		218.273		250.925
60.061		93.5615		94.4748
89.661		501.281		304.602
251.098		254.37		66.4474
380.116		342.12		402.337
48.1269		81.5212		673.797
55.9824		498.596		371.895
59.8181		314.561		56.3239
77.5837		87.1275		-65.6631
89.3971		79.5318		-58.7264
49.6029		90.9902		108.543
79.2342		109.659		84.9718
253.185		93.3798		131.058
172.816		59.1314		86.9536
113.764		168.219		112.191
330.757		84.3841		85.6776
161.43		183.514		489.039
126.09		103.92		959.426
53.8256		1579.62		-129.491
241.461		90.3857		379.34
386.645		142.539		889.51
352.735		92.663		255.54
174.604		174.645		333.072
211.299		69.6644		64.6655
47.2827		46.407		74.6265
94.8816		54.0376		58.9835
62.3702		53.5236		743.202
73.6296		791.464		78.4879
63.3217		54.686		57.1497
116.144		-88.5652		-81.679
96.4409		144.216		-58.8473
108.44		97.955		-66.4052
126.184		146.684		-70.369
101.779		268.588		282.427
52.6757		220.198		-60.1956
130.732		175.81		274.536
96.7495		56.8745		69.6279
184.282		149.018		67.286
77.0111		87.9559		60.2799
130.942		228.152		66.8408
108.413		51.1641		230.771
153.833		146.597		56.2644
132.572		109.324		315.476
56.4132		65.8979		76.9156
97.0605		84.3551		965.533
158.087		55.553		535.204
106.178		62.0586		140.015
73.5652		-64.4438		132.352
62.8972		206.714		-53.4885
91.8064		63.5697		-55.2794
181.606		389.229		59.3743
99.3609		234.944		150.715
262.213		145.749		62.2579
72.393		218.447		138.905
78.7214		226.843		770.083
123.683		200.689		66.3861
246.253		58.4887		454.545
416.274		273.686		53.2296
80.3713		274.202		109.672
123.436		54.1337		164.491
91.1378		396.894		197.999
108.875		93.9963		62.5794
72.3901		791.19		177.605
96.2419		269.081		196.995
86.7334		202.673		233.421
163.466		252.7		-66.2888
302.871		108.84		68.8924
122.05		58.4425		68.8585
444.128		51.6074		411.214
109.651		104.423		517.702
153.222		76.8539		115.861
155.532		100.433		228.466
50.8703		125.329		348.364
66.9368		59.5671		69.1576
447.694		538.934		64.4311
117.448		83.0859		-58.6721
472.037		66.358		-78.1107
126.86		222.741		62.9382
165.992		57.2255		517.056
215.811		123.182		103.916
49.9127		100.85		391.69
123.264		285.277		-63.2267
195.516		179.77		115.459
75.2443		193.873		57.8019
193.652		223.501		359.475
322.042		205.204		204.778
49.0123		481.641		500.322
41.9231		68.7222		92.1474
199.633		131.455		328.173
363.954		64.8216		812.598
192.276		53.0393		84.8727
129.809		270.633		252.065
253.857		178.481		67.4615
113.119		292.797		280.193
88.4312		158.613		65.5513
340.429		195.017		432.769
176.866		310.162		498.226
50.1726		854.155		111.51
224.699		444.55		-108.749
77.485		130.932		-82.7463
55.321		74.0465		253.646
237.959		92.8799		659.562
144.071		383.693		-74.3822
327.935		206.252		143.475
212.879		196.124		175.923
69.583		121.841		310.594
119.175		247.685		406.598
102.516		224.737		84.4625
83.3108		77.8847		61.3884
139.552		503.243		505.835
70.4995		153.409		77.7989
318.603		209.784		78.3534
70.4364		153.548		62.7947
311.307		110.354		239.046
239.891		141.448		287.396
282.537		56.7667		-85.1629
242.021		56.2281		785.673
134.246		209.921		121.497
77.093		80.9462		270.336
313.6		71.9916		70.1815
99.2879		77.221		98.5818
99.1911		82.4304		232.698
52.0624		200.959		60.7248
217.408		135.412		-93.848
234.941		203.856		360.449
72.1067		709.72		117.811
71.9991		63.9286		68.467
64.4743		60.5923		-79.5979
143.898		51.6306		192.295
168.91		122.566		62.3556
69.1111		107.999		79.9497
227.592		56.3382		395.089
86.5782		462.99		-87.1755
75.8178		-61.5926		193.234
270.141		81.6669		670.921
60.1515		-86.9422		84.306
657.403		69.1416		568.346
164.88		184.224		62.7837
52.7721		83.9718		88.7759
176.239		370.283		385.098
203.377		177.076		63.9079
110.169		198.12		237.649
130.607		295.579		86.2439
392.388		1030.99		97.8512
69.6496		69.4357		88.4519
232.777		139.253		54.8999
63.3991		399.005		86.3645
75.1875		622.497		164.631
102.259		96.3049		277.709
195.318		258.332		292.359
62.6175		88.4049		64.3087
140.415		212.009		187.313
50.4742		314.847		211.727
162.45		2858.53		70.4311
51.6181		137.639		93.4992
40.0428		86.8023		56.8266
77.8378		411.561		74.449
72.515		232.547		60.0248
123.896		81.7742		341.717
56.1714		128.073		93.0555
306.331		58.6568		335.581
125.778		322.395		162.913
79.5727		1353.93		226.468
82.4485		60.5311		70.6655
63.8455		65.8047		59.1718
56.9099		315.775		60.5881
627.769		120.231		-62.9438
133.504		151.412		58.866
57.7279		93.4942		123.733
235.444		234.412		67.9862
71.0724		154.014		94.3198
110.917		106.864		60.9621
49.5095		585.432		69.4731
512.172		84.607		60.6847
163.212		155.962		-90.9462
68.5583		70.7874		91.9613
399.067		126.066		-92.3723
178.537		104.991		626.585
371.278		241.015		70.5881
99.4771		72.6874		59.3003
110.89		69.4026		71.9488
91.4998		64.5636		68.939
101.092		78.3017		131.95
86.6535		117.949		69.8631
200.045		335.778		135.183
60.2967		162.059		1092
103.215		93.4861		82.1305
59.3057		165.055		63.6031
92.6999		67.5585		70.4777
233.027		89.0933		549.246
691.763		280.106		-108.833
62.1333		61.1938		63.9924
286.127		159.956		121.351
99.7463		189.597		79.0924
109.6		118.954		59.1185
138.646		138.585		-65.8382
54.8317		301.139		57.7048
118.199		214.745		143.951
169.706		92.8376		-62.9695
399.646		155.695		-68.4075
220.464		197.293		142.566
72.186		59.5993		74.7447
307.634		89.207		-69.087
161.612		-201.239		-101.153
688.785		538.731		-66.3515
146.074		167.54		80.9434
85.3438		152.494		97.9301
66.8735		117.456		196.533
340.519		243.946		359.354
443.424		67.464		-51.728
275.02		150.518		98.352
127.715		71.5828		401.641
101.983		75.2045		548.409
130.763		102.957		67.7126
227.399		369.645		738.614
75.123		598.351		264.429
152.882		151.794		577.153
329.165		535.096		1194.19
161.098		70.3422		67.6404
175.695		133.38		86.4898
49.8177		93.2261		-61.3038
170.872		92.9766		-78.3674
55.6581		66.4896		599.756
89.0191		65.6229		49.7628
58.8974		120.776		62.7886
198.317		142.527		64.0321
140.867		82.737		62.5261
95.8813		75.4163		130.05
190.613		58.6229		68.8492
526.967		74.769		67.6604
91.1466		236.554		934.437
82.3378		193.306		55.359
361.736		109.144		70.6182
44.6477		563.888		-74.202
51.9993		245.334		-61.6339
51.8044		265.272		337.814
197.45		60.8933		70.2698
151.46		827.372		-67.4769
83.8237		258.152		153.871
771.776		45.41		85.2196
185.035		1794.94		387.408
115.651		66.0617		-65.7654
167.743		149.781		84.1683
85.2186		44.7689		81.6656
239.839		281.017		204.031
75.3342		135.348		88.5766
63.1758		65.197		163.034
151.894		206.001		96.6668
390.76		193.143		402.891
90.1647		324.992		327.819
54.3891		67.4313		-69.2413
92.5878		230.287		67.3465
244.114		130.203		67.0691
87.7448		56.0367		54.6326
79.3079		-64.7147		897.428
132.498		72.831		333.457
211.415		210.657		86.9887
230.697		139.327		79.5851
106.344		72.0535		55.0761
139.123		166.417		-69.9392
98.7355		109.817		394.18
84.1755		194.115		80.3984
64.1781		96.8992		140.67
263.536		81.423		732.332
279.071		76.0859		51.1459
87.5988		83.9065		69.9189
1129.2		261.647		-56.6994
108.726		185.562		141.009
173.933		131.556		304.545
46.7001		56.6441		63.9244
161.701		140.195		50.9794
262.432		58.5237		-1116.43
428.573		71.1234		106.055
163.885		75.8781		1021.42
136.777		140.798		54.5982
156.837		160.457		115.199
132.555		200.765		101.279
1146.03		72.2972		312.846
74.6334		285.612		58.8015
53.5274		101.458		170.869
165.199		225.373		-53.3636
46.4027		98.6284		118.515
919.916		234.329		350.034
56.4136		108.355		161.056
260.452		91.8191		-115.274
86.7609		533.454		1767
96.5973		258.439		141.063
245.013		66.2777		219.505
114.342		111.464		86.991
64.5647		322.323		-65.1611
311.953		79.7877		62.0574
67.5133		494.752		459.427
84.136		672.457		79.1603
43.6034		327.6		-60.0142
56.4974		86.6772		273.459
-86.8925		58.5028		-64.3776
54.5527		75.8191		564.711
243.111		220.146		64.4533
144.446		77.7327		115.267
196.779		96.9171		83.5169
528.507		150.376		114.672
152.451		346.008		62.7782
146.138		161.909		71.6519
148.17		213.215		51.4698
305.253		84.71		88.5412
53.5004		62.3364		139.948
53.0229		53.1651		103.347
43.9775		120.74		153.924
717.458		100.614		-69.7085
106.613		264.836		136.839
72.9072		116.423		224.539
52.9159		1159.44		254.366
140.135		289.296		-57.9464
275.265		265.704		171.404
63.4065		201.234		184.302
58.1524		134.046		84.332
93.6935		85.6841		160.059
129.834		162.173		213.239
95.6191		67.2676		372.635
111.331		52.5699		105.385
124.925		463.933		55.0724
311.377		475.209		63.609
150.703		233.75		119.772
167.789		69.1484		678.393
283.356		62.3491		-59.1321
213.697		276.472		68.0037
124.193		48.3144		101.152
51.4498		68.8352		129.126
138.336		193.417		55.8984
86.9165		282.716		97.7367
111.361		96.5222		147.573
174.909		60.3959		133.695
183.541		174.731		109.748
94.7169		61.2611		786.55
257.132		152.99		-117.072
119.128		211.088		74.6119
221.398		92.456		93.0304
752.419		72.0892		270.629
75.2771		112.866		147.969
132.104		358.013		383.632
190.388		64.0729		333.327
169.989		67.6294		94.8141
197.529		81.9187		67.9334
53.2018		124.111		151.39
56.1333		71.0927		69.8898
137.589		94.9198		730.781
40.0067		151.149		65.8461
68.5288		170.831		67.3263
72.8393		57.1087		69.8074
152.34		128.165		65.4368
146.797		150.695		83.2893
113.651		155.979		87.8474
281.964		398.912		238.842
51.28		146.909		62.6135
76.5994		63.6934		60.133
74.9581		70.3697		66.3871
80.0173		73.7644		431.26
76.9181		86.3855		194.373
133.961		66.4637		102.304
85.0447		62.7541		52.8306
97.5178		238.651		-63.5364
74.6609		101.415		122.527
57.4131		260.741		118.299
37.918		62.1835		-69.8411
56.8014		-128.671		71.1509
60.9018		276.69		84.1279
137.334		335.446		66.7081
71.0844		779.617		60.2134
119.453		56.4115		76.9164
155.331		162.215		69.0157
162.269		241.979		93.2737
57.2989		67.7876		67.1229
59.5926		143.004		63.9353
166.124		-415.084		101.773
157.758		64.8483		736.939
44.4177		377.786		-68.221
135.953		287.782		107.784
54.679		62.3198		223.58
76.2608		262.872		83.9435
214.2		66.4246		415.659
91.0022		76.6849		55.3178
93.1533		126.268		278.777
71.0368		990.443		-86.6347
72.2642		144.036		-56.6663
91.3132		134.524		73.3264
326.019		237.109		412.299
129.881		136.924		-61.5067
124.299		236.714		129.929
109.776		68.364		84.1648
524.804		114.438		169.424
53.06		134.913		62.2439
134.612		239.21		376.48
195.163		88.4423		119.525
152.362		82.716		56.7229
2246.57		68.2871		194.165
74.0918		60.4548		51.6366
86.6366		154.945		54.763
303.642		391.853		-66.4186
176.563		-76.4812		109.424
157.66		75.9972		240.125
-46.3695		263.742		357.319
259.949		338.533		49.2366
244.817		48.7768		156.543
94.4324		55.3079		64.3579
352.577		234.625		306.671
135.374		107.575		58.6043
118.145		51.809		50.2781
234.412		115.618		58.9729
117.691		177.678		169.071
126.09		339.088		565.491
126.652		195.208		360.636
235.813		211.54		67.1731
91.2428		185.788		188.973
54.4948		207.849		81.395
402.029		107.812		392.705
153.489		132.231		-85.2005
66.1044		71.755		53.9869
57.6262		83.934		190.026
219.531		120.119		128.418
91.8071		144.366		-56.7968
80.2115		55.7374		398.125
148.074		304.027		-71.1368
114.674		207.966		87.4828
143.083		93.2472		85.2043
118.635		63.8098		68.1266
64.4401		838.991		111.428
176.585		117.903		65.1026
86.8725		55.1369		-73.2599
1043.31		114.603		109.059
294.295		128.093		501.358
66.644		435.39		62.2375
44.5959		71.7228		88.6536
74.059		119.985		272.069
154.463		87.1768		-71.067
107.818		97.2175		63.3454
107.888		64.2271		172.354
44.1427		63.6525		248.685
66.6391		107.116		135.15
102.779		66.1707		115.964
48.5126		154.742		55.3503
94.4488		63.8938		1020.2
53.6401		-70.4532		-61.3711
69.8889		62.4271		120.753
103.376		129.015		58.5469
66.9919		288.89		804.23
105.963		159.176		133.498
214.646		150.108		57.4284
58.5984		89.9036		235.286
286.994		86.4433		100.313
289.468		183.359		-49.4827
312.231		132.201		246.854
127.445		224.576		153.768
87.6729		114.325		157.844
83.8022		165.001		105.46
294.639		197.312		233.276
79.9272		253.254		53.8867
450.79		11480.1
216.333		97.361
229.938		-114.581
311.993		69.928
75.5961		391.961
169.249		88.0467
950.844		149.931
174.817		144.395
394.147		143.192
212.804		67.0704
138.698		71.9911
196.641		-67.8595
175.178		308.248
247.873		67.4605
89.2801		47.9145
132.694		94.6253
73.525		197.633
68.4559		121.71
90.2297		119.107
314.107		83.4215
72.4107		148.08
70.9341		457.159
98.6348		93.7143
52.6056		92.8912
133.638		156.802
44.3528		265.985
60.159		72.6364
81.2738		77.6197
64.1447		1760.71
199.49		259.699
102.065		84.9525
46.3837		468.254
77.0676		170.295
94.5053		58.6394
66.6195		1024.34
-47.4363		84.9162
263.016		192.859
138.267		77.2402
158.731		61.1052
44.2356		76.6937
140.783		-80.065
122.838		76.4052
135.048		194.974
393.328		83.633
104.381		219.897
137.09		78.0287
418.004		-59.3774
193.457		71.3407
96.7099		134.139
52.7545		211.025
54.1587		112.447
67.8591		73.536
106.772		221.308
40.6225		226.055
150.863		235.676
462.125		110.367
165.106		52.2677
55.5034		169.263
94.6989		55.6404
55.1408		58.4836
335.45		141.529
331.186		56.9674
172.923		63.5849
98.7654		59.9193
110.066		101.745
99.3671		60.4302
294.431		278.99
259.924		211.082
83.3575		83.0241
235.123		122.014
109.647		-214.219
79.22		216.928
128.135		76.1012
55.8642		83.4445
139.096		69.8184
47.1462		104.987
183.216		100.9
83.5065		64.4295
141.511		84.5089
109.123		145.42
59.7606		52.4193
51.7207		151.458
190.008		77.9526
125.712		61.6503
105.214		64.69
72.9202		170.268
233.539		340.762
41.7233		66.1113
92.8106		413.571
123.559		59.9791
258.859		51.4973
117.029		55.8696
208.629		556.992
190.771		334.951
226.117		108.047
330.599		46.1662
392.591		74.3503
148.733		99.5582
74.2401		599.772
304.311		104.501
143.575		66.907
144.583		93.0552
72.219		82.0869
301.196		93.2011
86.3326		86.8132
77.9826		55.194
151.434		216.087
114.583		96.4531
73.4342		72.8576
60.5276		397.36
286.092		67.4169
312.762		385.924
314.811		279.473
34.9968		477.407
85.7237		976.244
112.002		346.599
98.1176		101.74
109.191		98.5873
124.062		87.2614
97.8602		150.009
68.4763		47.2674
147.741		57.2131
429.095		152.561
305.968		60.0921
131.564		155.71
328.766		142.453
127.507		198.756
99.0784		64.2204
89.6262		95.9885
56.2904		267.242
38.8078		195.845
58.1221		276.991
140.434		65.8004
50.0985		70.0122
74.1666		213.306
138.529		81.4285
80.0136		95.3014
112.462		91.1302
59.4945		255.306
58.7304		302.751
119.626		125.077
102.39		161.517
277.615		321.206
76.0639		99.6162
57.3643		66.477
50.421		109.884
124.627		65.2842
208.402		103.781
121.949		170.254
222.024		267.342
168.394		98.38
91.5547		179.383
252.182		70.076
107.429		135.796
66.4479		273.935
129.528		71.0758
434.995		62.1275
187.304		53.6856
60.6778		96.1453
95.7511		47.7237
177.564		69.304
64.3534		57.9061
287.459		126.932
220.42		112.373
148.678		74.7768
174.471		78.7265
264.778		430.617
171.736		56.8925
45.7334		68.6324
81.2767		161.835
359.399		63.5347
232.544		62.4258
63.3347		67.9714
47.1606		77.588
77.4897		90.6453
81.6997		268.283
262.173		90.7308
281.24		138.848
130.04		84.5037
140.883		226.03
90.9773		226.678
95.1808		105.14
189.674		127.839
191.973		110.88
54.7837		159.498
86.0236		48.5142
330.049		131.759
53.4571		138.737
54.9298		149.234
172.465		189.083
226.465		333.398
58.0293		97.9823
36.9178		56.393
126.189		65.3088
66.8153		74.8552
271.068		55.9165
81.0631		74.5397
158.148		200
91.3086		103.249
46.9573		210.082
212.256		107.285
87.3567		85.8931
197.926		166.362
94.2151		163.632
59.6313		54.8559
103.123		200.488
73.7267		56.2369
72.7626		815.52
130.463		320.411
344.063		331.754
124.941		168.957
393.172		111.701
83.6687		197.307
153.763		44.3464
88.7658		310.674
99.8691		138.369
152.213		120.167
191.266		55.5333
157.851		105.104
358.742		237.026
-52.1829		106.706
65.5154		79.3358
77.7907		122.375
112.872		167.96
181.443		213.339
103.119		100.857
104.214		219.752
200.782		58.2385
43.8083		-66.7306
77.1386		97.8955
236.927		332.229
117.178		151.925
129.421		121.917
141.961		96.2689
122.061		117.722
320.999		188.035
95.9642		444.612
152.398		69.9585
93.9681		221.165
294.922		56.6443
75.7422		101.463
78.9122		107.894
61.2555		130.952
83.304		1058.6
117.751		72.0009
81.9162		65.8551
43.4651		134.24
52.1601		74.3839
70.9266		65.4285
102.419		74.3892
93.3404		291.479
79.3376		65.5551
172.91		148.98
128.439		72.395
177.103		77.8827
64.0716		54.9751
104.989		72.231
315.927		99.3208
136.586		227.215
155.228		107.882
105.013		148.992
166.243		-138.499
68.0232		125.273
59.6184		201.37
87.6692		-127.807
142.354		75.6718
286.502		214.889
92.8624		97.247
97.9352		454.584
135.453		240.887
49.1199		109.876
254.6		59.4168
155.402		-116.934
101.048		210.157
58.3568		241.833
135.876		70.3294
205.789		64.7351
185.733		155.575
55.9056		113.593
250.394		436.41
56.8201		77.9197
504.873		68.0964
211.475		205.002
109.813		142.278
51.8933		45.8863
331.519		413.707
77.7103		72.2268
105.863		182.696
102.673		452.332
143.687		184.313
230.252		76.9185
117.259		92.7822
215.419		157.615
316.964		296.717
122.244		93.5659
198.033		87.986
51.4005		84.3442
218.415		85.7355
114.74		84.887
180.863		406.261
667.004		73.456
240.834		198.582
920.822		60.4559
1529.5		-98.8985
396.223		128.311
167.284		-111.286
60.7263		473.228
467.579		104.782
55.9589		197.361
146.133		97.9941
126.906		68.8202
205.246		103.147
65.512		73.7075
301.382		114.601
90.8975		68.069
244.124		74.9645
702.253		68.8322
61.0006		-56.2487
275.289		127.285
262.484		169.083
48.3741		159.145
93.847		-66.9499
231.946		223.745
402.962		102.829
258.138		62.3997
71.4207		64.3008
81.0891		87.0563
208.552		64.0575
63.8896		207.228
233.038		273.488
369.39		454.944
213.273		60.2954
449.511		61.6717
107.805		288.406
338.243		217.356
115.812		219.3
93.93		140.054
60.6172		251.955
350.807		165.378
297.236		71.8893
258.901		77.0652
145.259		73.2329
266.912		122.249
581.777		74.7235
177.416		258.779
465.954		62.6869
404.846		54.6278
47.4869		78.0535
388.719		215.966
317.492		97.7908
109.63		80.8782
59.8176		103.855
74.8376		64.5009
50.6059		76.8549
1135.32		158.966
392.983		112.519
60.1012		191.748
129.59		618.459
584.868		230.47
192.479		107.134
138.803		57.3551
137.645		377.551
184.881		126.794
502.896		134.844
382.375		-57.4585
164.932		122.773
566.879		89.056
52.9494		228.102
123.818		75.0183
199.435		60.7667
152.715		143.432
374.91		237.349
137.342		71.9751
55.9886		182.618
138.267		103.393
563.458		80.7374
508.513		90.9325
848.767		543.761
168.299		87.5395
169.198		161.868
327.054		249.694
-63.4837		70.0855
940.391		88.8671
193.935		-76.9938
75.9804		93.9283
74.529		171.481
145.613		-55.0612
131.361		107.018
92.9307		227.723
659.445		71.7539
119.861		95.5363
427.389		73.1811
44.9422		73.5832
137.689		95.6916
108.669		969.236
59.2644		111.786
56.3135		62.3566
55.531		131.662
151.842		-75.1614
187.243		97.0054
388.835		55.5917
270.04		136.518
210.67		128.426
150.026		90.0877
204.731		65.2756
-46.7491		71.6785
55.6942		580.088
405.426		68.1011
56.7142		-125.731
49.3499		86.7404
89.3965		47.0347
47.698		135.483
192.477		-89.0204
329.326		69.2578
372.343		176.071
136.086		166.249
498.205		303.776
120.469		-57.4645
120.043		65.6616
332.747		442.222
125.577		385.386
115.433		191.682
144.168		-59.2966
161.878		64.8127
87.4932		79.7589
60.7296		261.831
127.491		63.5771
174.709		329.168
197.469		353.319
243.47		-73.2498
97.8943		201.126
707.116		228.725
[truncated: 2,959 more rows]
