# Supplementary material for: The Candida albicans virulence factor candidalysin polymerizes in solution to form membrane pores and damage epithelial cells
Source: eLife journal article supplement (doi:10.7554/elife.75490), 2022-08-16
Supplement: fig6-data1 [file MP_Data_I9A G4W_Figure 6_Source Data 1.xlsx]

## Sheet: I9A
	Exp 1		Exp 2		Exp 3
	Mass (kDa)		Mass (kDa)		Mass (kDa)
	-113.98		72.6158		615.165
	125.308		268.436		63.9628
	471.428		89.2361		-59.6962
	58.4366		277.243		79.9636
	-130.219		82.6403		-70.4239
	690.245		124.061		123.633
	27.1919		76.1887		52.1862
	35.5275		83.2348		130.425
	48.8795		-85.8415		59.8909
	366.057		247.485		296.765
	58.6448		108.983		-112.899
	-39.6312		-100.891		123.567
	51.9689		103.482		63.2171
	49.0211		318.513		63.2407
	370.475		202.781		-62.4788
	114.8		226.926		68.8518
	47.0921		612.628		76.2421
	62.1391		54.9138		80.0824
	81.7241		516.412		154.257
	691.229		79.1994		152.634
	-121.234		570.26		-222.112
	56.8757		379.419		90.4097
	69.7204		60.1878		71.4815
	47.0181		58.1993		79.1038
	37.8502		58.4671		87.9902
	76.611		115.751		128.639
	61.6355		-114.339		237.501
	452.05		59.2195		97.8592
	49.736		-52.9917		510.603
	-61.9932		301.607		638.076
	77.5448		120.017		843.615
	533.467		74.6831		56.6037
	40.4244		-65.8439		-67.8428
	514.356		442.841		67.0455
	62.9422		307.05		-76.2031
	54.1006		78.0982		72.0512
	47.3344		84.8613		50.9254
	53.6643		71.347		-59.8223
	771.824		-90.7173		80.3192
	-58.8854		304.853		54.4019
	-129.27		51.5267		-76.652
	54.0234		286.766		80.9646
	-66.7604		99.3183		897.552
	73.3281		65.5655		70.7865
	54.6761		85.1893		-69.6875
	-85.7287		83.8595		154.116
	88.4008		-109.09		234.288
	677.553		589.259		63.2816
	-56.1253		68.2854		79.503
	1074.98		48.1531		73.8573
	63.7356		66.4669		436.726
	65.8266		-85.4731		67.2753
	92.7435		81.3469		63.5994
	78.152		62.1745		74.961
	253.024		54.3924		676.658
	1849.87		71.5113		102.895
	-62.1795		90.125		53.1362
	-46.0191		409.165		473.489
	64.7351		214.343		283.505
	61.8023		65.7077		47.8718
	35.6176		125.085		442.639
	464.527		63.18		55.5895
	5114.58		344.993		69.8554
	1090.93		193.659		246.879
	46.8575		72.5284		177.688
	142.14		-99.928		80.4474
	590.877		266.999		502.848
	72.5472		45.4971		1170.89
	-45.9779		142.249		64.8157
	74.4937		98.7401		60.5495
	73.5316		149.731		108.601
	86.776		58.7094		-58.6556
	388.979		135.318		487.868
	176.797		74.2952		65.1792
	840.101		421.275		57.0104
	171.895		606.195		477.732
	310.039		68.6735		64.395
	56.8115		75.5042		66.6351
	47.8863		608.078		58.6769
	-43.0802		62.5143		77.0329
	1012.33		270.745		104.017
	79.1243		273.375		-69.9519
	38.385		51.5773		291.218
	68.8001		871.107		54.706
	52.6247		73.8598		66.1279
	97.1306		237.215		60.8881
	428.764		94.4611		265.754
	-47.8344		230.786		61.7831
	62.8338		515.802		792.654
	59.1509		65.7282		98.3836
	103.788		88.5729		-102.232
	89.9736		287.986		67.5716
	61.5267		146.383		686.727
	55.1514		369.62		47.2265
	403.234		99.8217		742.578
	1600.37		161.295		1076.68
	-61.1833		51.0599		111.876
	77.7411		78.8854		580.506
	989.427		161.259		80.9812
	304.658		104.899		62.6597
	145.036		115.454		1796.64
	357.841		333.821		102.76
	59.3335		-97.0876		62.1853
	46.5912		84.5596		-68.465
	-52.3697		97.2609		61.5427
	61.843		220.687		-126.481
	1032.26		-109.49		81.7611
	259.337		391.353		67.634
	289.724		74.4609		65.3841
	56.8027		271.268		-54.3583
	79.5947		-54.1492		130.624
	-47.7395		51.2776		-126.858
	42.8339		-75.6278		106.723
	155.741		228.995		-64.9728
	-174.639		46.3412		65.608
	688.78		96.6385		71.2036
	255.304		-68.2709		445.447
	60.8721		98.539		72.2868
	263.314		394.484		63.0959
	101.174		224.776		61.3075
	63.4192		-75.3656		79.9827
	54.1686		113.461		68.5479
	69.2777		77.8814		-71.7314
	329.678		1382.96		68.0928
	364.617		115.759		86.4411
	273.533		128.443		61.6111
	74.6634		616.128		66.4797
	-39.5898		328.647		78.2811
	53.5972		589.536		72.939
	-46.967		93.9374		62.0292
	127.795		55.8398		104.508
	47.1168		67.0826		907.955
	46.87		215.347		679.918
	68.0511		52.8432		78.7851
	-39.5695		73.3875		65.8906
	56.01		-79.6385		69.1757
	61.4089		59.9912		66.4647
	57.9916		70.6415		-91.1016
	2421.86		65.9921		172.396
	54.3553		70.9614		654.12
	94.5845		126.451		1351.6
	46.5201		-48.3619		130.881
	103.506		125.887		80.5903
	394.956		-87.0237		73.5631
	119.489		73.1742		468.689
	109.015		178.848		-400.951
	52.0835		94.3901		266.49
	629.98		502.382		76.8639
	1377.1		369.364		75.8089
	56.1523		87.2118		67.0021
	34.4526		64.2819		-149.943
	46.1301		87.76		85.1841
	198.275		410.811		52.356
	2050.96		77.8169		55.7252
	80.5772		83.3738		1075.16
	64.7531		360.229		56.2538
	533.403		-94.1452		78.1944
	57.864		272.709		58.2021
	189.367		112.014		2060.43
	58.5213		-119.576		205.444
	1242.85		325.866		203.153
	73.7901		68.83		72.3169
	1280.74		65.3699		84.2115
	229.839		-102.881		2279.99
	146.12		67.3666		930.463
	65.9995		64.192		64.7509
	512.056		87.3473		629.812
	42.4253		72.1792		90.3469
	37.8473		95.149		64.8395
	53.1458		72.0726		407.684
	61.655		439.344		92.8328
	74.5773		63.8623		84.0091
	76.9125		356.979		62.3259
	84.0632		70.0224		2383.9
	357.104		67.2289		344.779
	855.261		67.0955		74.7202
	55.262		-133.969		-58.0487
	450.821		90.3168		166.989
	151.954		62.709		62.6092
	475.421		78.9316		64.3727
	304.33		335.37		102.665
	73.7983		122.932		165.514
	53.5267		55.5846		110.876
	72.1525		1058.16		126.49
	127.503		135.172		-112.4
	-123.591		55.0505		98.0361
	38.377		172.677		604.289
	661.611		232.139		335.17
	482.885		102.448		59.1294
	201.73		67.2125		310.67
	1265.26		158.386		263.804
	162.452		86.4317		76.3564
	365.264		344.472		74.2574
	92.1541		253.592		69.1588
	160.912		96.6838		60.1014
	154.589		75.444		-71.8879
	58.0902		77.9729		-61.8595
	-29.4745		137.652		315.786
	753.077		205.628		127.942
	44.8225		-95.8251		60.8932
	123.273		383.657		62.6617
	198.213		90.9719		68.7257
	455.902		72.2033		-74.0868
	63.4609		-55.2401		89.6401
	-110.574		1031.31		1908.05
	292.351		73.6333		497.983
	51.4588		88.9059		-74.6159
	1582.76		228.773		76.255
	594.85		503.211		2039.24
	153.444		99.9398		180.712
	64.2122		336.317		65.541
	564.979		114.249
	58.7836		149.15
	-48.2043		89.74
	565.026		493.471
	43.7419		1228.66
	530.208		241.321
	86.1697		178.353
	496.304		91.9916
	77.8838		-61.0854
	594.851		74.9418
	562.34		73.8247
	49.4389		67.9702
	2403.2		72.0024
	54.5589		-91.5564
	167.652		-92.3949
	2457.08		94.5631
	90.6594		66.7047
	144.054		216.9
	52.6309		177.53
	43.9084		104.549
	540.341		61.7301
	86.0472		76.5281
	168.184		86.5979
	433.891		44.6164
	455.576		279.368
	76.1556		88.0662
	57.1821		489.843
	1168.49		149.249
	114.046		-100.827
	42.9483		1866.08
	48.0109		188.739
	-60.8141		105.64
	78.1421		62.7364
	-68.6933		97.9738
	52.3035		62.4477
	55.5241		266.095
	61.0996		73.5325
	108.862		-52.0035
	474.609		91.6695
	56.6733		90.1852
	196.144		361.333
	297.641		-92.3473
	99.6785		246.065
	1261.91		546.002
	679.844		73.6374
	-42.704		101.689
	600.652		598.163
	220.857		469.908
	69.1441		93.4447
	664.599		198.762
	-45.7308		471.408
	1148.84		134.901
	543.489		365.936
	-38.291		112.789
	1555.55		87.9117
	-32.4228		-61.7
	1198.21		168.922
	767.913		59.2965
	58.6136		415.958
	-68.1499		56.3636
	61.1812		276.782
	1845.87		83.3742
	-92.7816		270.578
	109.293		128.55
	69.0922		1334.79
	159.897		56.1707
	-113.769		291.915
	372.366		99.5832
	133.23		429.592
	740.536		69.6944
	530.513		56.2606
	58.6834		487.941
	671.327		490.638
	103.784		197.613
	106.371		73.5058
	145.446		52.2336
	201.604		64.6696
	170.694		92.9327
	52.1677		57.7688
	93.5827		210.74
	74.839		140.643
	42.0495		-78.0054
	77.4756		159.537
	820.594		62.986
	50.795		252.479
	62.3725		56.934
	76.774		54.7035
	725.338		-56.0522
	168.6		133.342
	282.806		64.002
	37.4746		48.7316
	-183.83		288.305
	-68.0001		76.8532
	66.7374		151.215
	-173.006		1116.52
	65.8506		59.0894
	56.1845		515.315
	-80.3818		96.7173
	71.9497		584.81
	1187.5		139.015
	-64.7274		1279.44
	1168.91		504.839
	143.911		492.109
	94.7985		378.786
	47.6545		617.716
	56.3886		-956.084
	93.0615		737.66
	62.4951		509.008
	-51.6292		584.128
	79.6176		1455.2
	-48.1776		105.465
	45.3408		-72.466
	797.265		241.7
	482.869		111.469
	406.221		201.836
	120.094		312.233
	65.0031		481.811
	739.95		90.523
	116.114		356.74
	208.785		-70.7004
	41.4578		616.773
	46.69		70.9189
	129.933		71.9871
	137.673		75.5192
	41.948		239.2
	59.2386		223.066
	937.79		101.601
	273.494		65.8591
	250.202		50.1067
	-279.826		239.469
	59.8086		195.663
	738.846		45.3551
	44.5826		54.6931
	685.307		-102.727
	76.4323		356.61
	38.997		81.9648
	88.4215		54.6955
	-93.9902		180.725
	446.848		58.0337
	285.657		971.934
	-118.471		578.082
	-93.2523		565.978
	418.44		134.918
	508.447		81.0937
	67.4559		56.9645
	103.888		331.514
	225.697		105.336
	55.6895		397.815
	356.351		-82.5135
	71.0444		73.2187
	500.131		244.836
	130.041		394.379
	713.325		48.7853
	513.958		74.5023
	188.621		549.849
	306.057		99.7577
	40.8169		203.115
	530.527		-88.2453
	357.53		238.473
	43.6276		1420.39
	70.4112		64.7082
	1953.89		165.561
	713.835		745.489
	850.61		88.9682
	2105.2		61.8115
	55.0932		77.4801
	68.3394		93.2612
	-46.7827		114.041
	-67.9765		67.3173
	107.578		81.3716
	-86.6411		107.018
	417.077		-62.2049
	552.535		527.776
	65.4094		70.9535
	495.178		58.1692
	324.128		194.886
	319.849		75.8893
	34.2408		57.9121
	50.6453		81.4311
	73.455		100.25
	286.176		482.35
	682.791		324.319
	857.744		54.2049
	328.644		91.9028
	57.9826		54.2603
	273.707		464.451
	53.8241		-96.5635
	155.101		64.2281
	143.311		81.0249
	66.1623		-70.0512
	537.286		867.1
	-53.3198		69.7818
	59.8563		112.838
	344.127		608.014
	48.6165		81.1099
	69.7514		155.594
	99.8761		57.3092
	54.2017		-96.5353
	1100.27		91.8198
	1093.94		283.26
	194.12		92.1788
	316.972		122.775
	508.693		491.239
	177.518		101.281
	56.8546		-86.9981
	198.225		57.4076
	731.416		-99.7689
	35.511		264.955
	75.5449		210.459
	402.457		86.1024
	227.813		-259.953
	336.516		100.856
	41.4338		196.436
	256.517		44.5777
	303.07		52.6762
	367.638		66.0866
	106.41		-69.8246
	556.823		50.88
	539.88		153.207
	1439.77		237.679
	84.1465		177.688
	60.6355		84.3019
	75.3757		239.528
	263.854		55.7475
	783.446		122.142
	316.55		277.332
	51.5038		353.071
	222.837		217.057
	751.527		76.9011
	367.849		71.486
	294.272		64.8251
	235.593		56.369
	432.247		59.0452
	69.0826		-67.965
	82.1754		80.56
	-62.9955		-192.705
	40.2608		419.283
	63.9995		52.8587
	314.767		62.7526
	159.391		212.574
	108.69		79.0791
	139.977		107.239
	124.127		204.988
	-120.133		388.186
	336.719		183.098
	288.076		245.361
	90.3243		91.7174
	206.163		144.652
	206.441		61.9515
	440.001		85.1476
	66.5789		337.26
	79.1362		63.1393
	95.4313		54.9184
	121.92		123.57
	240.179		740.895
	160.377		-106.468
	1667.25		78.4586
	1167.71		-88.9529
	310.15		87.5404
	990.414		84.5566
	221.983		48.9226
	50.5799		77.1714
	38.1322		89.7527
	62.3241		59.3721
	95.7726		46.4136
	51.2003		192.962
	-48.123		61.6243
	510.282		73.6968
	275.669		58.2991
	48.5534		348.337
	-66.8334		-82.5282
	324.634		57.7299
	573.368		272.027
	209.746		59.2176
	1020.91		-68.7267
	198.705		119.426
	53.8145		67.4488
	208.534		-76.0443
	60.256		49.447
	191.657		196.186
	1216.25		119.701
	51.0704		57.9765
	78.7735		62.3423
	330.537		370.914
	64.0636		431.718
	89.5172		139.418
	236.929		-94.4808
	94.4781		96.1292
	-39.1162		53.5953
	3015.03		494.036
	311.767		-100.694
	237.519		89.6167
	43.8709		-95.6975
	1734.26		384.284
	82.183		87.1538
	1031.19		42.4118
	474.875		77.8395
	131.859		119.686
	298.423		176.292
	-58.1194		102.346
	1789.84		73.976
	802.429		105.009
	68.9223		351.213
	98.4881		361.93
	62.3917		612.356
	122.664		482.292
	59.3064		95.0586
	-51.5264		105.618
	397.233		70.1737
	417.581		531.2
	228.719		136.719
	175.37		378.166
	100.441		50.2356
	47.9085		315.322
	61.3832		96.1836
	533.283		57.63
	409.898		-101.275
	44.4504		306.488
	271.83		53.5627
	1245.93		55.4721
	46.4086		160.92
	-56.1565		425.816
	108.204		51.6164
	108.432		81.7419
	201.816		-51.526
	229.87		-69.1786
	743.229		69.4155
	190.519		-85.3214
	128.1		61.1191
	113.665		84.9746
	278.287		482.786
	43.9609		70.0699
	288.011		48.2671
	54.6201		70.7709
	-56.7934		76.8878
	310.458		55.997
	49.4088		133.312
	978.318		-123.886
	58.4273		58.5787
	2198.41		56.6579
	140.788		200.448
	-63.498		112.593
	59.4969		433.768
	132.255		65.1866
	58.4288		139.322
	42.6477		290.814
	153.803		160.212
	2873.45		48.9286
	278.292		86.5703
	292.069		155.073
	290.096		121.218
	1915.45		61.1619
	102.914		94.4561
	138.8		95.8925
	112.664		187.946
	388.037		-97.2227
	54.5		88.3027
	122.611		63.3367
	-56.3375		102.559
	165.231		461.493
	906.838		468.293
	95.075		73.4359
	424.945		91.4401
	85.5552		152.587
	220.252		340.483
	77.3607		145.467
	76.0194		144.846
	50.3321		177.35
	107.272		315.679
	276.063		687.161
	350.932		68.3769
	65.5127		158.288
	77.0954		750.269
	308.369		99.8695
	46.4993		160.044
	62.4882		73.9051
	704.069		397.8
	159.13		96.5903
	279.872		97.5289
	81.5607		63.511
	107.651		-100.134
	211.063		129.964
	656.35		62.4616
	79.0096		-147.104
	2149.35		241.496
	634.708		185.319
	320.38		58.2636
	234.746		95.3127
	152.69		53.7438
	256.966		74.075
	158.731		68.0881
	256.193		141.126
	242.214		172.223
	335.957		451.882
	392.396		118.699
	396.575		69.2943
	114.43		47.1164
	1426.7		-96.1946
	129.743		1395.59
	262.294		88.8355
	57.7184		58.3659
	253.239		195.937
	643.85		89.4468
	45.0663		476.18
	50.6481		-76.5379
	423.091		97.0489
	58.8452		47.0425
	991.155		67.3519
	258.031		60.0944
	911.13		98.0108
	753.471		552.909
	265.11		172.502
	355.236		368.17
	57.6477		60.894
	310.561		140.541
	409.135		198.627
	175.497		559.029
	564.677		113.41
	48.1952		56.7946
	59.8625		437.28
	115.774		-77.4798
	333.948		72.6527
	79.3871		120.501
	617.646		125.628
	259.878		410.287
	41.9143		84.5304
	342.012		67.329
	82.051		47.4967
	79.4277		58.0545
	391.384		64.2522
	531.472		481.761
	326.326		435.532
	32.9804		443.08
	343.562		195.367
	1264.84		379.154
	691.366		140.825
	154.07		74.1456
	280.671		77.4667
	57.3692		58.0446
	69.6059		54.1407
	409.423		104.479
	387.231		-187.725
	728.693		149.74
	149.399		-122.492
	266.283		119.232
	2696.67		84.5874
	54.0944		-86.1817
	184.603		140.453
	88.0562		80.7108
	235.976		-170.701
	206.082		58.2704
	695.296		863.831
	562.652		239.89
	75.7724		-115.2
	422.065		157.625
	490.481		-263.278
	86.1469		-151.63
	222.503		68.4089
	288.61		94.0019
	305.555		104.321
	279.34		139.533
	178.992		260.39
	40.4004		-71.9589
	196.711		514.643
	119.636		80.9893
	343.201		158.062
	235.647		161.124
	520.366		-64.8305
	243.382		-228.496
	51.7256		54.4373
	399.128		304.45
	106.129		70.8667
	100.195		-54.4379
	105.336		-91.9604
	119.729		78.4139
	44.3491		70.0385
	203.851		267.218
	226.327		137.039
	369.115		101.787
	658.417		61.6355
	990.05		225.362
	71.3489		-59.4981
	596.215		200.619
	117.563		66.4267
	87.5768		141.527
	85.9877		253.415
	76.9383		85.5538
	59.0714		61.3394
	699.274		243.539
	144.823		92.2617
	52.9507		88.8127
	210.608		-79.1766
	299.783		140.664
	533.019		135.326
	215.216		-83.159
	272.248		41.3148
	341.482		108.176
	117.784		63.122
	155.435		-161.911
	111.221		271.939
	621.422		-98.479
	176.523		222.737
	108.806		-85.5705
	123.845		-164.267
	259.372		118.717
	156.272		77.6466
	292.377		255.621
	178.887		186.672
	78.2573		-151.107
	1654.53		61.3275
	155.015		173.317
	107.471		-118.271
	116.908		290.287
	379.769		119.139
	326.321		57.971
	115.242		-181.415
	55.7964		-122.644
	173.038		71.6367
	64.8365		291.215
	138.858		82.5558
	85.1007		-141.572
	509.534		226.413
	40.5471		115.553
	51.9698		499.597
	324.657		-47.4636
	935.747		107.35
	159.903		82.5409
	370.98		56.641
	812.508		252.357
	107.169		-266.897
	77.5632		75.171
	52.802		317.519
	410.093		-168.617
	326.615		-79.2474
	126.994		65.5728
	794.704		78.0791
	-40.8437		135.144
	519.902		-108.59
	292.997		839.615
	1187.42		-90.3378
	1246.71		62.1034
	233.916		58.3453
	553.463		84.7705
	73.0334		191.097
	782.367		174.898
	498.009		446.587
	184.877		-91.1029
	181.732		78.0268
	58.8543		319.666
	66.621		-94.8432
	1053.47		133.591
	50.3918		-92.6517
	42.2344		120.854
	60.9381		120.855
	483.72		68.0114
	120.511		-126.975
	580.032		95.0285
	153.882		-88.0714
	254.712		97.3315
	326.861		-106.259
	127.838		85.8766
	257.385		-134.802
	102.955		-157.473
	101.147		106.036
	113.898		-162.106
	101.125		75.4351
	168.094		51.3956
	78.1361		76.2373
	349.664		72.0125
	-166.24		-90.0424
	-39.8205		71.5824
	98.2125		77.8548
	228.855		156.917
	138.65		134.589
	237.004		188.684
	564.588		137.546
	74.9602		-141.166
	585.956		68.406
	219.074		121.387
	2580.24		47.2082
	174.841		149.458
	436.875		-120.459
	149.168		86.3914
	61.7847		72.3919
	632.922		-103.302
	59.0235		61.1263
	92.4035		-175.94
	846.27		83.5563
	63.2646		201.726
	367.359		213.886
	108.297		163.868
	309.234		838.774
	420.677		181.216
	680.903		155.929
	902.127		104.476
	513.999		91.3796
	735.051		285.466
	44.2833		175.417
	675.534		250.347
	315.822		76.0336
	99.7611		47.4985
	77.27		141.878
	197.85		466.598
	151.802		101.142
	95.5826		74.1975
	407.415		-139.69
	47.6393		77.7249
	198.707		-165.462
	61.8375		140.29
	96.3372		86.7382
	474.691		48.0557
	157.306		153.912
	60.2093		100.857
	63.4226		376.854
	-65.1183		-96.9141
	122.433		50.5458
	48.807		146.404
	125.517		-96.7803
	291.131		-145.924
	269.277		-110.446
	197.245		-73.463
	441.373		156.901
	454.342		105.717
	61.374		75.2047
	95.4139		71.9246
	130.789		51.0246
	311.588		99.332
	1833.15		69.4224
	88.9278		-142.97
	760		70.8788
	425.65		57.9663
	86.6895		42.1085
	67.1496		104.441
	433.006		-94.3265
	337.961		71.3615
	321.756		170.178
	53.1821		141.561
	104.495		77.9747
			106.958
			95.1947
			190.813
			70.8704
			56.2513
			268.669
			463.803
			-115.22
			94.7872
			172.762
			81.1125
			68.1408
			-94.8021
			499.042
			376.794
			-115.656
			-113.121
			144.973
			-100.342
			133.166
			573.492
			212.252
			81.6178
			69.8622
			-141.227
			-84.5108
			91.4338
			77.9737
			92.1294
			-58.7921
			175.032
			173.82
			75.8055
			536.624
			80.2594
			-81.3764
			56.4433
			219.706
			282.569
			127.756
			76.3451
			144.647
			-103.123
			84.2845
			391.422
			-155.538
			75.9781
			-91.9162
			-98.4164
			175.241
			290.39
			132.675
			233.965
			125.108
			142.161
			191.419
			168.608
			270.074
			78.6143
			170.655
			-66.4137
			-221.198
			-67.5064
			153.734
			-133.732
			138.6
			54.3825
			57.7887
			165.817
			-129.856
			2083.18
			559.327
			57.3647
			-167.132
			132.23
			57.0229
			428.094
			-139.02
			54.9361
			-185.597
			120.278
			68.7147
			61.8498
			110.948
			153.964
			107.699
			56.4307
			153.878
			71.2603
			106.4
			-111.937
			70.2395
			284.21
			52.2048
			64.2629
			-175.427
			91.3093
			200.8
			-73.502
			206.884
			510.705
			69.6171
			-107.36
			55.5312
			-143.248
			86.7297
			129.082
			105.26
			145.815
			82.682
			59.2533
			-118.572
			-120.832
			113.203
			-131.155
			147.834
			138.143
			131.796
			1389.51
			-122.311
			128.073
			131.521
			106.855
			126.063
			419.45
			-106.072
			136.083
			94.9864
			-93.4705
			78.4205
			-101.153
			-130.111
			167.324
			-124.801
			131.007
			-99.0772
			-86.431
			118.799
			183.309
			-40.4591
			436.884
			94.0688
			133.153
			-89.9352
			142.886
			117.296
			105.051
			267.649
			-152.884
			-104.812
			314.514
			67.8364
			-95.2678
			73.94
			167.102
			79.1537
			144.745
			53.6297
			-90.1805
			-81.1333
			312.555
			157.491
			243.214
			-208.895
			400.843
			55.3136
			127.829
			110.489
			71.1547
			168.749
			-69.2574
			116.3
			-125.91
			-111.642
			128.045
			190.096
			-104.216
			-125.958
			46.9486
			-256.665
			1125.18
			65.8932
			161.985
			102.581
			90.6361
			69.8553
			-64.8845
			342.15
			222.729
			119.748
			392.548
			221.675
			78.8594
			-91.9216
			91.6616
			84.7358
			-156.001
			321.115
			280.799
			-129.021
			273.737
			-187.26
			-155.572
			66.5601
			-95.2563
			-118.182
			145.62
			89.066
			240.014
			292.3
			-79.3991
			184.217
			81.1014
			62.3704
			-133.528
			-72.4611
			64.557
			178.641
			288.126
			99.469
			-105.058
			-132.548
			-195.705
			104.155
			61.1555
			-130.237
			290.768
			185.616
			-179.431
			50.0534
			137.789
			56.2366
			709.281
			138.351
			-152.889
			109.51
			163.708
			-157.876
			368.229
			77.0007
			128.999
			137.854
			71.7897
			-78.4145
			-155.252
			71.3323
			123.189
			423.368
			-56.4444
			-134.029
			51.7714
			83.5523
			180.045
			177.156
			181.552
			137.966
			-91.1185
			-138.658
			210.353
			121.635
			172.645
			179.783
			-99.9785
			114.931
			-138.915
			70.5174
			232.302
			158.524
			-62.9502
			-66.0502
			-73.6757
			-130.847
			104.931
			93.915
			109.013
			65.2913
			-91.6298
			85.0887
			-115.256
			78.5937
			75.0038
			-173.207
			65.1263
			92.8341
			80.1896
			169.255
			633.829
			-125.945
			-123.333
			68.922
			59.4304
			60.9241
			-151.877
			-73.3179
			72.643
			-186.124
			402.095
			173.218
			137.39
			-63.5632
			274.211
			140.214
			97.7755
			-103.027
			-97.8795
			265.031
			72.2803
			-94.2761
			191.143
			-146.738
			-172.795
			102.942
			109.284
			493.463
			78.0263
			131.726
			-117.36
			92.8478
			-149.189
			-97.149
			79.7643
			163.606
			59.3689
			207.964
			69.6983
			-87.653
			66.1927
			77.1123
			130.263
			-52.0739
			91.1492
			-182.965
			391.674
			420.951
			137.73
			115.014
			84.7792
			-107.101
			-125.422
			75.8137
			-177.035
			56.2548
			113.243
			-72.4296
			140.972
			813.776
			-157.62
			-94.7798
			478.401
			-73.1273
			106.843
			-87.702
			640.137
			84.8431
			-103.388
			75.1646
			-120.202
			-69.3368
			157.714
			80.3066
			57.1491
			55.2547
			-160.71
			68.707
			76.1118
			-80.7988
			-65.8229
			114.53
			83.6991
			101.425
			157.267
			2445.52
			344.637
			-119.743
			-144.163
			133.446
			88.157
			50.3243
			75.4317
			124.907
			-113.224
			59.9284
			532.51
			116.087
			-112.582
			93.7252
			286.114
			441.84
			-105.536
			-142.627
			73.3236
			163.829
			-120.98
			504.658
			62.3652
			-158.687
			150.161
			81.41
			-64.5882
			477.847
			87.5455
			85.9374
			54.1486
			131.476
			-117.457
			205.092
			139.814
			-200.449
			164.677
			49.4213
			1247.35
			435.732
			148.501
			-92.6295
			100.533
			125.229
			296.921
			1696.39
			150.997
			-138.121
			116.043
			170.376
			292.266
			-88.8247
			-125.046
			119.993
			64.313
			99.6891
			54.3056
			-47.3935
			80.8761
			61.0478
			66.1536
			69.494
			149.032
			-111.154
			57.2414
			79.2782
			145.107
			-112.1
			102.86
			101.216
			-82.1379
			52.5831
			-64.9509
			179.832
			-101.803
			138.019
			54.718
			66.1518
			-128.574
			-94.5337
			-58.667
			86.895
			-117.925
			122.458
			-91.1125
			82.3659
			185.004
			-80.3007
			145.698
			61.1505
			70.0101
			72.5782
			651.273
			-91.9092
			-88.84
			-147.694
			1367.39
			-137.365
			1447.92
			93.3712
			127.764
			108.799
			112.148
			71.9896
			-95.3124
			77.699
			60.3844
			82.557
			373.658
			246.079
			-98.5777
			417.777
			-125.714
			-143.115
			605.337
			53.8948
			-153.469
			-111.801
			271.793
			125.833
			257.632
			-135.65
			65.0704
			108.209
			106.321
			122.118
			105.389
			-99.2395
			84.0444
			-150.519
			66.744
			674.774
			223.826
			-104.131
			114.838
			126.858
			312.288
			54.6849
			78.926
			-104.991
			-78.2174
			90.7598
			100.341
			-102.531
			182.342
			136.566
			568.519
			102.242
			270.478
			-184.946
			-147.355
			-50.3263
			-92.7227
			-168.725
			-149.307
			306.191
			82.2018
			122.715
			103.102
			200.324
			152.748
			255.776
			68.7908
			-201.397
			51.3494
			75.982
			-102.266
			224.384
			101.82
			73.5704
			-110.971
			-87.36
			97.5207
			108.483
			51.2722
			-145.846
			668.924
			260.872
			-59.9282
			183.204
			148.179
			74.9344
			59.0364
			160.001
			-174.75
			81.8867
			-175.165
			67.5095
			84.1439
			153.227
			105.065
			-135.919
			51.3983
			156.856
			-92.0735
			144.844
			91.0631
			-58.3036
			321.808
			387.485
			98.218
			54.8614
			81.1963
			-90.7003
			128.455
			-71.8514
			349.111
			90.6965
			-107.255
			-95.3453
			133.686
			163.132
			172.918
			144.629
			129.908
			252.317
			70.1073
			170.1
			142.098
			64.5233
			-95.1098
			47.2043
			296.341
			136.647
			-125.705
			-135.235
			142.655
			110.486
			47.9679
			58.5337
			213.633
			-105.099
			108.771
			524.132
			-224.225
			649.301
			-132.401
			-80.6041
			374.457
			-80.056
			56.7163
			110.355
			125.736
			105.607
			-126.534
			-122.424
			98.5544
			288.792
			-136.743
			-137.001
			140.125
			-53.1693
			-121.944
			-129.853
			-101.183
			451.653
			90.7856
			219.428
			-109.937
			112.249
			136.038
			278.774
			79.3736
			-106.351
			-82.0464
			-103.007
			87.4814
			55.6395
			219.255
			81.3406
			-64.8021
			61.537
			84.9637
			151.905
			89.016
			-109.877
			-172.829
			214.24
			-105.216
			-104.482
			140.73
			-101.498
			100.316
			101.315
			153.636
			-95.6557
			-114.733
			113.103
			-59.6605
			276.086
			184.344
			62.1875
			-122.288
			86.9863
			-95.8183
			67.1416
			-104.034
			187.271
			-122.031
			182.485
			196.402
			69.3409
			108.166
			296.675
			-84.5693
			55.4708
			108.52
			94.9688
			76.8155
			-116.287
			-88.8975
			65.1346
			97.0065
			-137.247
			39.7128
			143.647
			761.895
			95.5113
			58.3352
			139.607
			194.267
			-64.0041
			113.304
			-70.5096
			158.11
			354.191
			-102.884
			126.918
			-121.689
			167.813
			135.77
			127.219
			69.6934
			-80.8312
			92.781
			75.0897
			-84.8322
			-98.2634
			101.12
			855.183
			83.1266
			64.0444
			108.417
			83.1083
			-124.696
			146.53
			-160.703
			-148.766
			-54.3692
			306.44
			-159.059
			48.8259
			-124.955
			-68.9804
			84.3385
			76.8858
			-118.467
			55.0568
			-80.7588
			108.541
			62.348
			-152.599
			102.243
			2777.67
			-110.521
			93.9937
			395.369
			71.9562
			132.765
			516.403
			-88.509
			-124.52
			-116.405
			143.957
			-61.3466
			164.103
			117.618
			-85.7749
			76.7586
			108.272
			61.1766
			105.81
			-104.248
			297.227
			91.7702
			-178.157
			-107.297
			-159.983
			388.352
			111.565
			-140.205
			-65.1093
			-67.8119
			229.411
			327.473
			114.861
			68.8394
			617.01
			-62.7348
			-91.6191
			341.338
			386.986
			49.3031
			155.255
			226.308
			73.0924
			-126.505
			-58.9572
			-158.611
			89.9727
			-139.414
			-112.108
			99.019
			66.9244
			81.8159
			119.495
			67.2338
			-98.118
			52.9735
			-138.767
			-90.9827
			-139.296
			126.567
			73.0948
			585.044
			184.332
			-109.888
			126.098
			-89.9844
			111.076
			-178.249
			-108.748
			88.825
			93.0168
			116.533
			74.5968
			67.688
			909.616
			-120.102
			289.474
			-85.2337
			-101.108
			213.331
			-129.269
			-143.16
			60.6214
			79.0097
			75.0584
			66.8777
			-61.861
			74.3669
			1940.97
			601.239
			74.2823
			-70.0898
			-72.4828
			288.893
			-56.4516
			64.5458
			82.8482
			115.651
			74.4055
			-55.5659
			81.2791
			115.664
			83.985
			133.586
			48.5898
			-124.687
			80.4091
			-56.8939
			272.118
			67.7496
			89.7438
			-100.465
			65.6587
			66.532
			-94.6407
			68.1577
			-79.0055
			101.117
			-76.8282
			99.0229
			-114.585
			62.6998
			73.4593
			89.0449
			90.1096
			48.9807
			104.251
			143.766
			65.8615
			65.5773
			-84.126
			149.438
			-86.5312
			156.598
			69.0878
			79.6183
			70.808
			-166.017
			184.373
			-180.291
			227.655
			-51.1006
			89.9954
			69.7858
			176.655
			94.3255
			-161.407
			-64.5143
			79.7487
			2133.02
			51.5298
			131.573
			63.6915
			-107.435
			131.325
			104.864
			76.9556
			71.2831
			53.9166
			-114.645
			94.9745
			54.3381
			107.558
			82.6552
			59.3212
			68.6833
			120.115
			99.6384
			-94.8237
			75.0332
			68.7055
			125.221
			-58.1069
			-94.3928
			-70.2657
			-55.8595
			63.9764
			-60.6893
			116.107
			-54.9168
			87.0092
			84.4771
			88.7339
			67.3907
			298.732
			81.076
			78.8676
			92.4442
			62.3099
			160.246
			147.299
			117.595
			69.3808
			75.4985
			-120.788
			202.512
			279.135
			59.0543
			70.4131
			1027.99
			62.5913
			78.2092
			74.9806
			60.5108
			-75.1811
			93.9761
			65.8314
			88.9237
			63.4357
			65.3791
			67.3185
			-62.9545
			87.0803
			-67.2819
			700.083
			65.0301
			63.9548
			127.443
			62.3207
			-61.4653
			53.0654
			91.9446
			-57.545
			83.3513
			57.3525
			-84.3239
			65.1905
			80.7958
			-83.1012
			78.5502
			221.889
			773.18
			-252.088
			61.4984
			-65.5147
			66.7464
			111.277
			-58.6969
			87.7651
			70.7507
			82.9815
			81.2782
			78.8605
			-68.7509
			111.469
			-70.1581
			-94.4253
			68.6867
			68.2403
			115.722
			276.935
			311.929
			79.1225
			71.864
			295.958
			-81.106
			60.9006
			84.1832
			-74.3337
			-334.966
			97.3185
			202.069
			-138.895
			74.6412
			177.057
			50.797
			-177.747
			270.318
			209.485
			70.391
			79.0985
			430.384
			103.588
			79.6809
			75.9952
			59.0523
			58.3377
			-104.43
			66.3123
			67.7245
			91.2325
			305.645
			586.233
			66.936
			53.2145
			118.6
			337.607
			58.8876
			203.718
			77.2325
			-92.6131
			61.2017
			73.1865
			78.909
			-52.919
			70.5481
			66.381
			-61.2109
			84.2957
			239.396
			80.0902
			141.629
			70.4427
			83.7007
			114.301
			69.9232
			69.4835
			59.1164
			44.4118
			65.0777
			-78.7596
			71.5356
			-72.6575
			87.9788
			128.247
			127.314
			110.182
			-99.7331
			107.385
			-63.5294
			-100.789
			-117.126
			65.0042
			57.347
			88.3554
			143.039
			-76.9184
			95.5915
			-60.5461
			-117.288
			80.8475
			61.221
			127.712
			58.1385
			125.404
			151.813
			672.33
			58.5598
			1564.65
			67.0689
			65.7583
			302.187
			151.108
			46.8483
			-275.044
			67.5649
			80.2673
			-136.887
			71.5678
			57.7703
			59.7536
			-57.6914
			-58.6624
			79.445
			47.7511
			-51.4277
			81.7831
			-63.2684
			-83.0572
			68.2087
			89.078
			74.7962
			-89.3567
			80.8455
			-66.3804
			300.295
			85.7203
			119.423
			1930.86
			53.5443
			60.6258
			62.4475
			103.11
			172.699
			160.114
			-219.719
			54.9774
			119.625
			-193.275
			-103.616
			146.073
			150.888
			78.4005
			58.8468
			55.3607
			69.0914
			506.287
			114.44
			59.6063
			74.2596
			-66.0617
			65.746
			99.1731
			110.419
			63.9108
			90.3882
			71.7442
			151.604
			340.909
			-95.9231
			-68.3671
			55.2135
			173.807
			-85.8043
			65.9497
			317.948
			79.8815
			-81.4545
			-63.4655
			1496.43
			73.2155
			55.4886
			116.31
			64.2949
[truncated: 128 more rows]

## Sheet: G4W
		Exp 1		Exp 2		Exp 3
		Mass (kDa)		Mass (kDa)		Mass (kDa)
		130.397		-103		-176.167
		101.072		58.8		-204.863
		90.8833		69.7		-345.81
		117.941		69.3		-231.806
		126.729		106		368.213
		108.168		56.5		-138.851
		111.846		62.2		257.63
		-98.0511		68.1		117.326
		-102.113		89.6		-162.086
		-103.854		61.4		114.457
		-87.9259		156		117.944
		93.5873		-87.3		-83.9259
		90.6802		82		68.9779
		-81.5988		54.6		-75.5133
		92.5349		80.3		51.8105
		109.673		65.7		81.0163
		115.452		334		98.3285
		96.9134		-59.2		81.8026
		-93.7858		67.3		73.2453
		166.322		67.6		75.0547
		101.853		70.2		704.46
		204.049		-70		74.3875
		-190.622		61.9		69.6257
		189.015		87		146.64
		-191.205		68.8		185.815
		114.56		69.4		68.3548
		116.556		101		-62.5733
		-111.062		65.9		66.2664
		110.108		74		68.5672
		111.806		51.8		60.7622
		59.2148		207		75.7239
		-120.131		111		-54.818
		-32.8819		98.4		142.656
		-104.606		179		-67.1373
		-43.879		62.9		47.7586
		316.209		143		-115.24
		125.889		522		-55.9828
		-36.6277		145		88.4403
		113.366		80.9		58.5118
		-96.6591		63		146.728
		109.021		260		129.293
		53.736		73.2		-55.7482
		275.908		51.7		49.6015
		265.779		71		94.6308
		445.798		61.1		93.7516
		158.21		70.6		122.552
		67.5258		79.8		77.1873
		56.3067		60.1		-86.7184
		61.1871		66.1		-54.5993
		-126.759		61.5		139.557
		-55.7275		59.1		-70.0698
		133.86		52.5		51.9743
		68.1962		51.9		105.581
		-96.9806		53.2		65.2246
		-111.277		-53		587.168
		431.664		65.9		64.4197
		452.279		57.1		-70.7732
		132.465		-59.909		-73.55
		258.048		64.1522		59.1937
		66.0978		-67.7121		-67.3539
		58.8194		91.9466		-63.1871
		-44.4062		61.3003		75.7559
		93.8878		80.8794		105.787
		114.629		77.8363		60.8195
		312.303		-81.7109		61.1853
		63.0589		121.99		87.1337
		80.3467		213.663		293.996
		63.0249		67.4327		89.7828
		134.074		256.947		53.0022
		211.433		69.9101		70.5807
		66.7005		65.8308		130.691
		64.0491		-68.4668		-116.822
		73.7115		123.092		-56.9484
		50.4224		53.8053		65.5165
		-36.0343		57.6909		120.117
		-108.353		66.662		-116.605
		519.915		67.1029		61.8399
		71.3237		78.0919		57.6388
		-53.7136		84.2801		-54.9801
		62.5008		65.4867		72.0311
		-30.1062		87.0871
		81.2422		45.1682
		-50.2282		-44.0302
		81.9454		87.2342
		105.645		89.5106
		92.1797		165.595
				60.0222
				326.791
				-86.2857
				73.2269
				183.389
				-84.4062
				66.5712
				296.189
				86.4714
				77.2589
				58.8313
				77.0151
				107.557
				66.3103
				69.2068
				-79.9427
				188.736
				-118.041
				190.871
				106.369
				122.101
				67.2056
				73.902
				60.8975
				76.9252
				79.5976
				-53.7662
				191.631
				177.69
				-204.373
				55.6741
				-58.8655
				-64.4631
				-66.415
				84.9529
				271.215
				-51.6434
				98.1627
				48.8921
				93.1639
				80.415
				73.6418
				73.2365
				72.1395
				-50.2734
				66.5186
				77.3664
				95.6706
				90.2807
				63.8149
				110.08
				91.3322
				85.8496
				-49.3919
				114.024
				86.7558
				69.5323
				78.313
				74.7077
				90.0216
				264.532
				60.9806
				89.2404
				82.5064
				142.556
				69.6385
				-69.8128
				62.7713
				390.04
				50.6013
				73.8928
				99.25
				177.629
				-55.1939
				77.0662
				60.651
				207.359
				102.518
				55.483
				56.2788
				58.9252
				60.212
				76.5408
				68.9494
				66.8559
				163.969
				77.5121
				68.8087
				109.954
				-103.736
				97.3751
				73.0723
				66.6608
				-44.6509
				71.834
				85.1151
				67.3989
				144.905
				67.9274
				57.7404
				53.7192
				57.3451
				84.6173
				59.046
				-65.4089
				182.723
				107.378
				117.227
				-51.0442
				-48.8119
				-54.7998
				-43.8365
				-56.6173
				-66.4067
				-44.626
				-53.6941
				-62.6744
				-70.2952
				-69.7635
				-58.7611
				-57.3573
				-80.7842
				-84.0785
				-70.2893
				-55.0403
				-79.1577
				-71.8157
				-67.1043
				-99.7412
				-58.8004
				-70.6697
				-69.6652
				-62.0263
				111.004
				-90.3858
				-53.3909
				-78.2181
				-100.457
				-68.3537
				-81.4033
				-56.9138
				-90.6824
				-64.292
				-87.4373
				-66.1874
				-92.4631
				-79.2214
				85.3794
				70.7241
				-102.479
				-73.9602
				-60.4885
				-71.4902
				-65.1678
				207.839
				93.159
				-100.711
				-76.2412
				-59.6505
				94.0865
				-70.4207
				-99.4983
				-74.579
				86.9744
				-72.6789
				-94.0009
				-83.0863
				-86.4355
				-67.9551
				-58.8232
				59.2982
				-57.9577
				-60.3856
				61.6433
				67.44
				49.1182
				51.9995
				58.7064
				66.7596
				61.8228
				81.0066
				65.0391
				81.6876
				-62.1105
				72.3767
				67.144
				-74.0801
				60.5851
				80.0796
				93.6913
				111.274
				106.728
				56.7679
				-76.5163
				107.446
				101.424
				102.928
				93.318
				-84.9241
				122.037
				88.4133
				127.22
				84.803
				87.4569
				113.412
				73.4795
				96.3275
				123.337
				109.474
				78.4279
				102.955
				109.425
				113.921
				68.6993
				73.3912
				96.199
				97.0146
				76.5419
				118.603
				77.7436
				83.6037
				91.6283
				75.4095
				76.0677
				95.5165
				70.6596
				93.6765
				65.943
				60.5605
				73.1987
				72.607
				62.2937
				71.2164
				71.2117
				70.1358
				107.528
				50.426
				-91.7446
				98.6969
				47.0234
				55.0469
				-87.8172
				50.8226
				43.3989
				42.9011
				61.4672
				54.5269
				64.5872
				60.7666
				72.9068
				60.9782
				67.5474
				88.6997
				71.7804
				52.3154
				80.4802
				59.0774
				133.48
				82.5342
				78.7246
				78.2784
				58.8592
				103.275
				103.029
				170.14
				232.56
				63.4258
				65.4314
				49.5551
				55.5396
				66.29
				77.52
				113.833
				87.7392
				62.8965
				79.3522
