# Supplementary material for: The Candida albicans virulence factor candidalysin polymerizes in solution to form membrane pores and damage epithelial cells
Source: eLife. 2022 Sep 29;11:e75490. doi: 10.7554/eLife.75490 (PMC9522247; doi:10.7554/eLife.75490)
Supplement: Supplementary file 1. [file elife-75490-supp1.xlsx]

## Sheet: Sheet1
						Parameter				Value
				Pre-IMS Zone		Source: Gas Temperature				300 °C
						Source: Drying Gas				5 L/min
						Source: Nebulizer Pressure				13 psi
						Source: Capillary				3800 V
						Optics I: Fragmentor				250 V
						IM Front Funnel: High Pressure Funnel Delta				110 V
						IM Front Funnel: High Pressure RF Delta				180 V
						IM Front Funnel: Trap Funnel Delta				160 V
						IM Front Funnel: High Pressure Trap Funnel RF				180 V
						IM Front Funnel: High Pressure Funnel Exit				10 V
						IM Trap: Trap Entrance Grid Low				82 V
						IM Trap: Trap Entrance Grid Delta				2 V
						IM Trap: Trap Entrance				79 V
						IM Trap: Trap Exit				76 V
						IM Trap: Trap Exit Grid 1 Low				72 V
						IM Trap: Trap Exit Grid 1 Delta				6 V
						IM Trap: Trap Exit Grid 2 Low				71 V
						IM Trap: Trap Exit Grid 2 Delta				13 V
						Acquisition: Trap Fill Time				1000 µs
						Acquisition: Trap Release Time				100 µs
				Post-IMS Zone		IM Drift Tube: Drift Tube Exit				210 V
						IM Rear Funnel: Rear Funnel Entrance				200 V
						IM Rear Funnel: Rear Funnel RF				130 V
						IM Rear Funnel: Rear Funnel Exit				35 V
						IM Rear Funnel: IM Hex Entrance				42 V
						IM Rear Funnel: IM Hex Delta				-8
						Optics I: Oct Entrance Lense				32 V
						Optics I: Lense I				28.3 V
						Optics I: Lense II				15.8 V
						Quad: Quad DC				26.6 V
						Quad: Postfilter DC				26.5 V
						Cell: Gas Flow				22 psi
						Cell: Cell Entrance				25.6 V
						Cell: Hex DC				24.2
						Cell: Hex Delta				-9 V
						Cell: Hex2 DC				15 V
						Cell: Hex2 DV				-3 V
						Optics 2: Hex3 DC				11.8 V
						Extractor: Ion Focus				5.6 V
				Supplementary file 1. Agilent 6560 IMS-QTOF Parameters
